# Supplementary material for: Identification of Key Differentially Expressed Transcription Factors in Glioblastoma
Source: J Oncol. 2020 Jun 15;2020:9235101. doi: 10.1155/2020/9235101 (PMC7313158; doi:10.1155/2020/9235101)
Supplement: Supplementary Materials — Supplementary Table 1: top 100 up- and downregulated genes. Supplementary Table 2: enrichment of transcription factors based on analysis of differentially expressed genes. [file 9235101.f1.zip]

Archive with 2 entries (2 files):
- 9235101.f1/Supplementary Table 1.xlsx
- 9235101.f1/Supplementary Table 2.xlsx
