# Supplementary material for: Identification of Key Differentially Expressed Transcription Factors in Glioblastoma
Source: J Oncol. 2020 Jun 15;2020:9235101. doi: 10.1155/2020/9235101 (PMC7313158; doi:10.1155/2020/9235101)
Supplement: Supplementary Materials — Supplementary Table 1: top 100 up- and downregulated genes. Supplementary Table 2: enrichment of transcription factors based on analysis of differentially expressed genes. [file 9235101.f1.zip › 9235101.f1/Supplementary Table 1.xlsx]

## Sheet: Table S1
Supplementary Table 1. Top 100 up- and down-regulated genes
Gene	logFC	logCPM	PValue	FDR
KLK3	-7.20264	-3.35172	1.84501e-38	3.46338e-36
SLC22A8	-6.59753	-2.47094	9.60498e-36	1.33817e-33
NEUROD6	-5.96919	0.498037	1.80742e-30	1.48533e-28
LL0XNC01-16G2.1	-5.81253	-0.240868	1.39783e-25	6.39166e-24
GSG1L2	-5.79926	-3.01801	3.46319e-23	1.26815e-21
PRKCG	-5.79439	3.37264	4.05658e-45	2.26065e-42
PNMA5	-5.74216	0.569593	2.55653e-40	6.24528e-38
CNGB1	-5.6822	-0.166663	6.65539e-32	6.48555e-30
NWD2	-5.66635	0.271461	4.03272e-34	4.55161e-32
C1QL3	-5.64404	1.78627	1.45902e-35	1.97111e-33
SYT10	-5.62313	-2.84887	4.51111e-23	1.62847e-21
MCHR2	-5.61941	-0.858568	4.57366e-21	1.36164e-19
RYR2	-5.59018	2.80184	4.05657e-43	1.64411e-40
GRIN2B	-5.55652	3.70686	6.18358e-41	1.83786e-38
GLP2R	-5.53219	0.560597	2.96452e-44	1.39122e-41
KLK7	-5.52069	0.344978	1.63181e-19	4.22351e-18
GRIN1	-5.495	5.28692	8.18135e-28	4.76791e-26
KIF12	-5.43574	-1.66295	6.45943e-29	4.28219e-27
KLHL1	-5.38533	-1.13907	1.07149e-23	4.18114e-22
TRHDE	-5.36597	0.922176	2.8301e-29	1.97145e-27
SV2B	-5.35887	4.68543	8.7097e-31	7.43158e-29
HTR2C	-5.35413	-0.411757	8.38569e-28	4.85526e-26
SLC6A7	-5.33298	1.83358	1.54769e-26	7.79662e-25
TMEM132D	-5.33121	1.56946	1.64144e-26	8.19937e-25
GABRA5	-5.3238	3.14406	1.54708e-27	8.59474e-26
CHD5	-5.32337	4.36276	2.61839e-35	3.45879e-33
DDN	-5.30178	4.3768	1.03007e-35	1.42398e-33
KCNV1	-5.29356	1.45004	4.01899e-21	1.20455e-19
GPR6	-5.2929	-1.54194	1.88501e-17	3.78552e-16
HTR3B	-5.28511	-2.06333	4.01677e-21	1.20455e-19
RASAL1	-5.24235	2.87189	1.25092e-34	1.52793e-32
ATP8A2	-5.22843	3.2987	1.62241e-36	2.43129e-34
OR14I1	-5.2145	-2.86064	1.13372e-16	2.13942e-15
CACNG3	-5.21422	2.5208	1.727e-22	5.96852e-21
FADS6	-5.209	-1.15635	5.47551e-27	2.89747e-25
PROKR2	-5.20032	-2.95299	2.28647e-18	5.14181e-17
SVOP	-5.19516	3.49505	8.66248e-30	6.43659e-28
MAS1	-5.18919	-0.722831	1.76262e-24	7.39596e-23
CDH9	-5.18647	0.0556007	3.50826e-26	1.70937e-24
PACSIN1	-5.18185	5.16938	6.26954e-28	3.75184e-26
SST	-5.15875	2.40821	9.0883e-30	6.72497e-28
MPPED1	-5.15118	2.69169	4.7021e-30	3.66169e-28
SOWAHB	-5.14528	-0.277947	1.88098e-42	6.57717e-40
DLGAP2	-5.13268	1.61393	2.9072e-31	2.64511e-29
ATP2B3	-5.12544	2.76813	1.62401e-32	1.66442e-30
GPR52	-5.12451	-3.0724	4.55872e-27	2.42673e-25
CALHM1	-5.12361	-1.40426	4.17737e-37	6.77228e-35
SERTM1	-5.12325	1.22074	7.14977e-27	3.71725e-25
HTR1A	-5.12018	-1.44172	2.4411e-16	4.46943e-15
SLC8A2	-5.11306	3.97408	1.29363e-32	1.33348e-30
DRD5	-5.11268	-1.45527	3.52651e-21	1.0641e-19
C4orf50	-5.09737	-0.268882	1.58852e-30	1.31148e-28
HIPK4	-5.09075	0.126955	7.3794e-40	1.68714e-37
CACNA1B	-5.08457	2.77876	1.00487e-27	5.70695e-26
OPRM1	-5.07344	-3.46925	3.29187e-24	1.35889e-22
MAL2	-5.06995	2.48977	7.22664e-24	2.88952e-22
FRMPD4	-5.06152	1.94043	7.1762e-30	5.4226e-28
SSTR3	-5.03994	0.127172	2.6644e-30	2.13068e-28
HCN1	-5.02985	1.73009	1.10311e-23	4.29515e-22
STYK1	-5.02445	0.115677	5.39019e-29	3.62729e-27
CREG2	-5.02321	4.20433	7.96353e-32	7.71783e-30
SLC6A17	-5.01544	4.64933	2.11914e-30	1.71776e-28
CAMK2A	-5.01205	6.45095	1.71358e-29	1.22724e-27
SULT4A1	-4.97743	4.33634	6.09233e-28	3.67042e-26
SLC12A5	-4.96537	4.65871	9.0531e-44	3.93766e-41
OPALIN	-4.94876	4.10082	1.1699e-16	2.20073e-15
NPAS4	-4.94379	-0.296312	5.92878e-31	5.18274e-29
SV2C	-4.94311	2.07201	2.53518e-35	3.37387e-33
KCNC2	-4.92429	2.44138	4.79518e-22	1.58357e-20
SLC30A3	-4.92233	2.85512	1.06569e-34	1.31975e-32
SLC17A7	-4.92121	6.5893	2.29348e-21	7.07483e-20
WSCD2	-4.92026	2.00661	3.82832e-24	1.56944e-22
TESPA1	-4.91941	2.29608	5.45358e-29	3.64246e-27
TMEM130	-4.91279	5.08143	9.50272e-31	8.06962e-29
GDA	-4.91219	4.10898	2.29988e-27	1.25042e-25
SYT1	-4.90868	6.45458	5.43872e-29	3.64246e-27
RBFOX1	-4.90796	3.75337	1.25135e-26	6.39407e-25
GABRA1	-4.90634	3.86085	6.40219e-20	1.72127e-18
NEFM	-4.90119	4.31592	7.36783e-20	1.96987e-18
KRT222	-4.90072	-0.0819413	2.03299e-20	5.70036e-19
SYN2	-4.89756	5.74576	1.04196e-35	1.42932e-33
LRTM2	-4.87345	1.65985	6.45178e-22	2.09954e-20
CHRM1	-4.85942	2.98205	4.4848e-26	2.15572e-24
EIF4E1B	-4.85736	-1.45296	7.11927e-21	2.07787e-19
SLC22A9	-4.85121	-3.28966	1.4719e-20	4.17968e-19
ANKRD34C	-4.849	-1.77349	5.87698e-25	2.56873e-23
SSTR1	-4.84889	1.61589	4.04956e-21	1.21168e-19
RXFP1	-4.84844	0.629906	1.92093e-31	1.77492e-29
PPP4R4	-4.84586	2.12679	1.181e-39	2.6326e-37
GABRB2	-4.8414	3.54217	4.34159e-26	2.09253e-24
WNT10B	-4.8252	1.07375	1.72992e-31	1.60675e-29
CCKBR	-4.82457	1.31432	1.28121e-24	5.43997e-23
HTR1E	-4.82406	-1.61851	1.91695e-16	3.55722e-15
MYT1L	-4.81282	3.71574	9.31559e-23	3.30268e-21
RBFOX3	-4.80349	3.23636	2.55982e-25	1.14985e-23
CACNA1I	-4.78686	1.966	3.82653e-31	3.42908e-29
CPNE6	-4.77782	3.93331	1.33559e-24	5.64398e-23
SLC22A10	-4.76758	-3.3655	2.06705e-26	1.02394e-24
PHF24	-4.76542	4.14971	7.35649e-33	7.76262e-31
FBXO40	-4.756	-2.00291	2.83408e-30	2.24623e-28
CDCA2	5.69911	2.82451	4.80562e-15	7.74152e-14
GPR82	5.71813	2.01307	1.10805e-11	1.29914e-10
CDC45	5.73003	3.67292	2.51855e-15	4.15479e-14
METTL7B	5.74544	7.13688	4.32863e-08	3.12774e-07
E2F2	5.77307	3.23953	1.41588e-12	1.82043e-11
CFAP77	5.79351	1.88698	1.70096e-06	9.178e-06
BPIFB2	5.85893	-0.101851	0.000219539	0.000748038
MKI67	5.91617	5.5874	8.38773e-13	1.10146e-11
IGFBP2	5.9169	9.0952	7.1911e-13	9.49214e-12
ASF1B	5.92014	4.59173	1.23891e-18	2.85445e-17
PLEKHS1	5.96041	0.997525	6.52341e-06	3.17327e-05
IL2RA	6.00719	2.85156	0.000208182	0.000713253
FAM111B	6.00754	3.39571	1.73903e-13	2.42472e-12
IBSP	6.01051	4.3259	2.05652e-05	8.9318e-05
HJURP	6.01566	3.99874	3.1741e-18	7.0141e-17
NCAPG	6.04237	4.20602	5.18497e-19	1.24112e-17
CENPA	6.05716	2.93125	5.6276e-18	1.20476e-16
AC012005.3	6.08092	-2.16188	8.73974e-07	5.02275e-06
EVX2	6.09747	-1.00394	9.79437e-06	4.58553e-05
HOXC5	6.1038	-2.14032	6.1083e-05	0.000237577
MEOX2	6.12322	5.15847	5.48331e-07	3.26818e-06
NDC80	6.1254	3.9446	7.90056e-20	2.10599e-18
HIST2H2AA4	6.12915	-2.12252	6.07977e-07	3.59365e-06
HIST1H2BH	6.13857	-0.315006	8.03768e-08	5.51929e-07
FAM64A	6.14712	4.97398	1.23164e-13	1.74732e-12
BARHL1	6.14763	-0.939212	7.28214e-06	3.50885e-05
CHI3L1	6.23438	12.1687	5.51831e-06	2.72598e-05
HIST2H2AA3	6.24273	-2.03009	1.19212e-06	6.66013e-06
COL3A1	6.27478	9.38723	4.39368e-05	0.000176868
IGF2BP3	6.30443	3.7152	7.705e-12	9.15411e-11
IDO1	6.32932	1.17679	0.000108437	0.0003974
BIRC5	6.33928	6.04019	1.57125e-15	2.6434e-14
CA3	6.35571	5.73139	5.87673e-05	0.000229572
TROAP	6.45738	4.04747	1.00356e-16	1.89985e-15
HOXB2	6.47731	3.41269	2.86783e-06	1.48109e-05
HOXA13	6.49909	1.72436	7.18714e-05	0.000274744
FOXD3	6.55819	1.15715	1.62832e-06	8.82609e-06
E2F8	6.61469	2.00338	6.25546e-18	1.33437e-16
AURKB	6.69803	3.98542	9.84868e-18	2.04938e-16
HOXD4	6.71055	-0.393746	2.895e-06	1.49426e-05
KIF20A	6.74133	4.25627	1.33427e-21	4.17439e-20
NKX3-2	6.74817	0.688077	1.07064e-07	7.22115e-07
SCNN1B	6.74997	2.72173	4.08415e-05	0.000165982
HOXB6	6.75725	0.343642	5.45939e-05	0.000215154
AC009336.19	6.78863	-1.55538	9.2925e-05	0.000346029
POTEF	6.78894	-0.323258	7.78702e-25	3.37873e-23
DPEP1	6.80561	3.1974	3.60674e-08	2.63279e-07
HOXC6	6.87193	1.64996	3.60489e-08	2.63251e-07
MELK	6.9414	4.16346	2.89325e-18	6.41733e-17
HOXA1	6.97379	0.959513	5.97924e-11	6.43499e-10
HOXB9	6.98606	0.515766	0.000151947	0.000537526
OTP	7.07051	2.40253	3.55471e-07	2.18374e-06
GSC	7.16576	1.46314	4.16318e-12	5.09205e-11
DLGAP5	7.19698	3.76419	2.02282e-20	5.68077e-19
HOXC8	7.21225	0.694699	2.58461e-06	1.34731e-05
PBK	7.31459	4.86037	1.37824e-19	3.58283e-18
TOP2A	7.32824	6.89754	2.42436e-19	6.06361e-18
MNX1	7.33472	0.209622	0.000120956	0.000437439
HOXB3	7.33554	4.13386	6.38157e-08	4.4681e-07
RRM2	7.33817	5.82908	1.84336e-26	9.1823e-25
MMP9	7.36904	5.64706	1.27782e-07	8.47115e-07
UBE2C	7.38922	5.2414	8.07307e-20	2.14556e-18
POSTN	7.43366	7.91378	3.95765e-05	0.000161281
HAND2	7.47622	1.78435	1.93574e-05	8.44425e-05
MYBL2	7.71938	5.55478	3.97154e-18	8.69011e-17
HOXC9	7.76144	1.27244	8.37325e-07	4.83393e-06
TFAP2B	7.81632	0.66185	0.000262218	0.000876008
HIST1H3B	7.82514	-0.719926	0.000286271	0.000948722
HIST1H3G	7.86669	-0.613155	1.9435e-06	1.03793e-05
HOXB7	7.97799	2.79348	2.10864e-08	1.60493e-07
PITX1	8.09027	2.91849	2.84284e-08	2.11587e-07
PI3	8.18222	4.51147	0.000149441	0.000529293
GATA4	8.34259	1.15339	7.74139e-05	0.000293978
HOXA9	8.4165	1.29408	2.29027e-05	9.82497e-05
EN1	8.44724	3.05759	8.98928e-10	8.35362e-09
HOXD8	8.47313	2.81777	5.16331e-08	3.66988e-07
HOXB4	8.5543	2.48338	2.20827e-06	1.16509e-05
LTF	8.59872	9.41634	4.10103e-05	0.000166592
HOXA4	8.61592	2.1034	3.4622e-07	2.13343e-06
SHOX2	8.67645	4.03188	1.1498e-16	2.16519e-15
HOXA6	8.80671	0.319576	4.62563e-09	3.87636e-08
HOXC13	8.89779	1.67299	1.47881e-05	6.63895e-05
HOXA7	8.92813	1.76395	4.97212e-08	3.54813e-07
HOXD11	8.98289	1.83755	1.61282e-08	1.25268e-07
SAA1	8.98931	5.67729	7.06858e-05	0.00027056
HOXA10	9.12469	3.06541	1.06628e-09	9.80158e-09
HOXA5	9.21348	3.17613	2.94625e-12	3.64612e-11
HOXA3	9.23181	2.70006	2.22041e-10	2.21581e-09
HOXA2	9.27958	2.05751	1.52259e-07	9.96416e-07
HP	9.31462	4.51349	1.87253e-06	1.00279e-05
HOXC10	9.46648	3.48884	2.38769e-08	1.79813e-07
ADAMDEC1	9.47837	2.29281	4.7558e-09	3.97983e-08
HOXA11	9.48957	0.973892	8.13544e-07	4.70884e-06
HOXD9	9.80095	2.5803	6.00353e-10	5.6676e-09
HOXD13	9.94541	2.77583	3.416e-07	2.10714e-06
NKX2-5	10.0069	2.83245	7.74532e-10	7.25052e-09
HOXC11	10.1357	1.61861	8.91067e-07	5.11215e-06
PRAME	10.257	3.00655	0.000127016	0.000457131
C6orf15	10.8621	2.33602	0.000213727	0.000729734
HOXD10	11.4533	2.92323	2.15611e-10	2.15648e-09
