# Supplementary material for: Identification of Key Differentially Expressed Transcription Factors in Glioblastoma
Source: J Oncol. 2020 Jun 15;2020:9235101. doi: 10.1155/2020/9235101 (PMC7313158; doi:10.1155/2020/9235101)
Supplement: Supplementary Materials — Supplementary Table 1: top 100 up- and downregulated genes. Supplementary Table 2: enrichment of transcription factors based on analysis of differentially expressed genes. [file 9235101.f1.zip › 9235101.f1/Supplementary Table 2.xlsx]

## Sheet: TFBS
Supplementary Table 2 Transcription factor target enrichment analysis for differentially expressed genes
Term	Count	Genes	PValue	Benjamini
E47	1538	MEF2C, SCN3B, MAP3K9, RPLP0, LRRC7, TMEFF2, BARHL1, PTBP1, SCN2A, BSN, BTBD9, EGFLAM, NCR3LG1, DNAH17, CACNB1, CACNB2, CACNB3, FAM19A1, CACNB4, FAM19A4, CKLF, CCSER1, LFNG, CYP46A1, ARHGEF39, NDC80, GAS7, CAMK2N1, EIF4E1B, DUSP26, HPCA, RGS7, NUAK1, GRIP1, EZH2, YBX3, IL1RAP, IGFLR1, SLC22A6, AIFM3, SLC22A8, MMP17, CACNG3, CACNG2, MMP14, LRRC25, MYRIP, CPXM1, FAM153C, GRIP2, FAM153B, FAM153A, THE…	5.50523e-31	9.79931e-29
CHX10	1105	MEF2C, GDA, CRHBP, GRIN3A, CDH22, TMEM144, GRIN2B, RPLP0, RAB27B, LRRC7, RAB27A, INA, SH3GL3, TMEFF2, SCN2B, BARHL1, KIF5C, SCN2A, GRIN2A, OLFML2A, BSN, BTBD9, EGFLAM, ARFGEF3, RYR2, MAPK9, CMIP, UNC13C, SH3GL2, KIF4A, PLCXD3, CACNB1, CACNB2, CACNB3, FAM19A2, FAM19A1, CACNB4, FAM19A4, CASZ1, CCSER1, PPP2R2C, SGIP1, KIF3A, CYP46A1, NDC80, SERPINI1, GAS7, CAMK2N1, UQCRHL, AKNAD1, RGS7, PLCXD2, OPRM…	1.16272e-30	1.03482e-28
S8	1188	MEF2C, GDA, OSMR, CRHBP, GRIN3A, CDH22, TMEM144, GRIN2B, MAP3K9, RPLP0, RAB27B, LRRC7, RAB27A, INA, SH3GL3, TMEFF2, SCN2B, BARHL1, KIF5C, SCN2A, GRIN2A, BSN, OLFML2A, BTBD9, EGFLAM, NPC2, ARFGEF3, SSTR1, RYR2, MAPK9, CMIP, UNC13C, SH3GL2, KIAA1107, KIF4A, PLCXD3, ARHGEF28, CACNB1, CACNB2, CACNB3, FAM19A2, FAM19A1, CACNB4, FAM19A4, CASZ1, CCSER1, PPP2R2C, SGIP1, ARHGEF33, KIF3A, ARHGEF39, NDC80, S…	1.10972e-29	6.58432e-28
BACH1	1291	MEF2C, PDP1, GDA, SCN3B, OSMR, CRHBP, GRIN3A, CDH22, GRIN2B, SERPINE1, RAB27B, LRRC7, INA, TMEFF2, KIF5A, KIF5C, SCN2A, GRIN2A, BSN, ESPL1, BTBD9, LPCAT4, EGFLAM, DOC2A, NPC2, ARFGEF3, RYR2, CMIP, UNC13C, SH3GL2, NCR3LG1, KIF4A, PLCXD3, ARHGEF28, DNAH17, CACNB1, CACNB2, FAM19A2, FAM19A1, CACNB4, FAM19A4, C1ORF54, TMEM125, UPK1B, CASZ1, PABPC3, CCSER1, POTEG, LFNG, POTEF, POTEE, SGIP1, ARHGEF33, M…	2.6441e-29	1.17662e-27
AP4	1601	MEF2C, GDA, OSMR, DIRAS2, MAP3K9, RPLP0, VNN1, VNN2, LRRC7, RAB27A, TMEFF2, CYP1A1, BARHL1, PTBP1, SCN2A, BSN, BTBD9, DOC2A, EGFLAM, ARHGEF28, DNAH17, CACNB1, CACNB2, FAM19A2, CACNB3, FAM19A1, CACNB4, RCC1, CCSER1, LFNG, ARHGEF33, CYP46A1, ARHGEF39, GAS7, DUSP26, RGS4, HPCA, RGS7, TPRG1L, NUAK1, GRIP1, PCP4L1, LRRC17, MMP25, GTSE1, YBX1, IL1RAP, IGFLR1, SLC22A6, AIFM3, CACNG8, SLC22A8, ARHGEF19, …	2.12765e-28	7.57444e-27
LYF1	1030	PDP1, MEF2C, SCN3B, GRIN3A, CDH22, DIRAS2, GRIN2B, GRIN2C, MAP3K9, VNN1, LRRC7, RAB27A, TMEFF2, KIF5A, NODAL, SCN2A, GRIN2A, OLFML2A, BSN, BTBD9, LPCAT4, SSTR3, ARFGEF3, RYR2, CMIP, UNC13C, SH3GL2, UNC13A, HLA-DRA, KIF4A, DNAH17, CACNB1, CACNB2, CACNB3, FAM19A2, CACNB4, SERPINH1, UPK1B, CASZ1, CCSER1, POTEG, LFNG, PPP2R2C, ARHGEF33, MOBP, MYADML2, EMILIN2, SERPINI1, GAS7, CAMK2N1, EIF4E1B, BTBD16…	1.00454e-27	2.98013e-26
PPARA	1377	MEF2C, GDA, SCN3B, OSMR, GRIN3A, CDH22, TMEM144, GRIN2B, GRIN2C, VNN1, LRRC7, C17ORF96, SH3GL3, TMEFF2, CYP1A1, KIF5A, PDPN, KIF5C, SCN2A, GRIN2A, BSN, ESPL1, SERPING1, TMEM130, HLA-DQA2, BTBD9, HLA-DQA1, LPCAT4, ARFGEF3, MAPK9, RYR2, CMIP, UNC13C, UNC13A, NCR3LG1, KIF4A, PLCXD3, ARHGEF28, DNAH17, CACNB1, CACNB2, BCL2L2, CACNB3, FAM19A2, FAM19A1, CACNB4, FAM19A4, SERPINH1, C1ORF54, VWA5B2, CASZ1,…	1.62048e-27	4.12064e-26
GCNF	1438	MEF2C, GDA, CRHBP, GRIN3A, CDH22, TMEM144, DIRAS2, GRIN2B, GRIN2C, MAP3K9, RPLP0, SERPINE1, RAB27B, LRRC7, INA, SH3GL3, TMEFF2, SCN2B, KIF5A, BARHL1, NODAL, KIF5C, SCN2A, GRIN2A, BSN, OLFML2A, ESPL1, TMEM130, BTBD9, LPCAT4, SSTR2, EGFLAM, DOC2A, NPC2, ARFGEF3, MAPK9, RYR2, CMIP, UNC13C, UNC13A, SH3GL2, HLA-DRA, NCR3LG1, KIF4A, PLCXD3, ARHGEF28, DNAH17, CACNB2, CACNB3, FAM19A2, FAM19A1, CACNB4, FA…	3.54994e-27	7.89863e-26
MYOD	1403	MEF2C, GDA, OR8S1, CDH22, GRIN2B, GRIN2C, MAP3K9, RPLP0, C17ORF96, TMEFF2, SCN2B, KIF5A, PDPN, BARHL1, NODAL, PTBP1, KIF5C, SCN2A, GRIN2A, BSN, ESPL1, F7, TMEM130, BTBD9, LPCAT4, SSTR4, EGFLAM, DOC2A, SSTR3, ARFGEF3, MAPK9, RYR2, CMIP, UNC13C, SH3GL2, KIAA1107, NCR3LG1, KIF4A, ARHGEF28, DNAH17, CACNB1, CACNB2, BCL2L2, CACNB3, FAM19A2, FAM19A1, CACNB4, FAM19A4, MYBL2, C1ORF54, RAC2, VWA5B2, TMEM12…	3.96073e-27	7.83345e-26
AP1	1487	MEF2C, GDA, SCN3B, OSMR, CRHBP, GRIN3A, CDH22, DIRAS2, GRIN2B, GRIN2C, MAP3K9, RPLP0, SERPINE1, VNN1, RAB27B, LRRC7, VNN2, RAB27A, TMEFF2, CYP1A1, KIF5A, BARHL1, KIF5C, SCN2A, GRIN2A, BSN, OLFML2A, ESPL1, EXD1, BTBD9, LPCAT4, SSTR2, EGFLAM, DOC2A, SSTR3, MAPK9, RYR2, CMIP, UNC13C, UNC13A, SH3GL2, PLCXD3, ARHGEF28, DNAH17, CACNB1, CACNB2, FAM19A2, FAM19A1, CACNB4, FAM19A4, SERPINH1, C1ORF54, RAC2,…	1.94294e-26	3.45843e-25
TAL1BETAITF2	1351	MEF2C, PDP1, OSMR, CRHBP, OR8S1, GRIN3A, CDH22, GRIN2B, GRIN2C, MAP3K9, RPLP0, SERPINE1, LRRC7, RAB27A, C17ORF96, SH3GL3, TMEFF2, PDPN, PTBP1, KIF5C, SCN2A, GRIN2A, BSN, OLFML2A, SERPING1, EXD1, BTBD9, SSTR2, EGFLAM, DOC2A, MAPK9, RYR2, CMIP, UNC13C, UNC13A, SH3GL2, NCR3LG1, KIF4A, PLCXD3, ARHGEF28, DNAH17, CACNB2, CACNB3, FAM19A2, FAM19A1, CACNB4, FAM19A4, MYBL2, SERPINH1, C1ORF54, VWA5B2, UPK1B…	2.53045e-26	4.09472e-25
RFX1	1522	MEF2C, GDA, OSMR, GRIN3A, CDH22, TMEM144, GRIN2B, GRIN2C, MAP3K9, RPLP0, SERPINE1, VNN1, RAB27B, LRRC7, RAB27A, C17ORF96, INA, SH3GL3, TMEFF2, SCN2B, KIF5A, BARHL1, KIF5C, SCN2A, GRIN2A, BSN, ESPL1, F7, EXD1, TMEM130, BTBD9, LPCAT4, SSTR2, EGFLAM, DOC2A, NPC2, SSTR3, TFPI, MAPK9, RYR2, CMIP, UNC13C, UNC13A, SH3GL2, HLA-DRA, KIAA1107, NCR3LG1, KIF4A, ARHGEF28, DNAH17, CACNB1, CACNB2, BCL2L2, CACNB…	3.12922e-26	4.64168e-25
LMO2COM	1467	MEF2C, PDP1, GDA, OSMR, CRHBP, GRIN3A, CDH22, TMEM144, GRIN2B, GRIN2C, VNN1, LRRC7, C17ORF96, INA, TMEFF2, SCN2B, KIF5A, PDPN, BARHL1, NODAL, KIF5C, SCN2A, GRIN2A, BSN, OLFML2A, SERPING1, F7, EXD1, BTBD9, LPCAT4, SSTR2, EGFLAM, DOC2A, ARFGEF3, TFPI, RYR2, CMIP, UNC13C, UNC13A, SH3GL2, KIF4A, PLCXD3, ARHGEF28, DNAH17, CACNB1, CACNB2, BCL2L2, CACNB3, FAM19A2, FAM19A1, CACNB4, FAM19A4, C1ORF54, RAC2…	8.87177e-26	1.21475e-24
ZIC3	1019	OSMR, CDH22, DIRAS2, GRIN2B, GRIN2C, MAP3K9, RPLP0, SERPINE1, C17ORF96, SH3GL3, TMEFF2, SCN2B, KIF5A, KIF5C, GRIN2A, BSN, ESPL1, SSTR2, DOC2A, SSTR3, RYR2, CMIP, KIF4A, DNAH17, ARHGEF28, CACNB1, CACNB2, BCL2L2, FAM19A1, FAM19A4, MYBL2, SERPINH1, RAC2, VWA5B2, CASZ1, LFNG, SGIP1, ARHGEF33, MOBP, CYP46A1, ARHGEF39, MYADML2, KIF3C, CAMK2N1, EIF4E1B, PARP9, RGS4, HPCA, PLCXD2, ZNF536, KCNAB2, KCNAB1,…	9.05046e-26	1.1507e-24
BACH2	1112	PDP1, MEF2C, SCN3B, OSMR, CRHBP, GRIN3A, CDH22, GRIN2B, RPLP0, SERPINE1, RAB27B, LRRC7, INA, TMEFF2, CYP1A1, BARHL1, PTBP1, KIF5C, SCN2A, GRIN2A, OLFML2A, BSN, F7, BTBD9, LPCAT4, SSTR2, NPC2, EGFLAM, RYR2, CMIP, SH3GL2, UNC13A, PLCXD3, DNAH17, ARHGEF28, CACNB1, CACNB2, FAM19A2, FAM19A1, CACNB4, FAM19A4, SERPINH1, C1ORF54, VWA5B2, TMEM125, UPK1B, CASZ1, CCSER1, LFNG, PPP2R2C, SGIP1, MOBP, CYP46A1,…	1.13126e-25	1.34242e-24
HAND1E47	1188	PDP1, MEF2C, SCN3B, OSMR, CRHBP, GRIN3A, B2M, CDH22, GRIN2B, GRIN2C, RPLP0, RAB27B, LRRC7, VNN2, C17ORF96, SH3GL3, TMEFF2, KIF5A, PDPN, NODAL, SCN2A, GRIN2A, BSN, ESPL1, TMEM130, HLA-DQA2, BTBD9, HLA-DQA1, SSTR4, EGFLAM, SSTR3, ARFGEF3, SSTR1, RYR2, MAPK9, CMIP, UNC13A, KIF4A, PLCXD3, DNAH17, CACNB2, BCL2L2, FAM19A2, FAM19A1, CACNB4, FAM19A4, MYBL2, RAC2, VWA5B2, UPK1B, CKLF, CASZ1, PABPC3, LFNG,…	1.24294e-25	1.38277e-24
CDPCR1	1018	PDP1, MEF2C, GDA, GRIN3A, CDH22, DIRAS2, GRIN2B, GRIN2C, RPLP0, RAB27B, LRRC7, RAB27A, INA, TMEFF2, KIF5A, SCN2A, KIF5C, GRIN2A, OLFML2A, BSN, ESPL1, BTBD9, SSTR2, RYR2, UNC13C, KIAA1107, KIF4A, DNAH17, ARHGEF28, CACNB1, CACNB2, CACNB3, FAM19A2, FAM19A1, CACNB4, FAM19A4, C1ORF54, CKLF, CASZ1, LFNG, SGIP1, ARHGEF33, CYP46A1, ARHGEF39, GAS7, PARP9, AKNAD1, RGS7, PLCXD2, OPRM1, ZNF536, ELF4, KCNAB1,…	1.27409e-25	1.33405e-24
RSRFC4	1205	PDP1, MEF2C, GDA, SCN3B, GRIN3A, B2M, CDH22, GRIN2B, GRIN2C, SERPINE1, LRRC7, RAB27A, C17ORF96, INA, SH3GL3, TMEFF2, SCN2B, KIF5A, BARHL1, NODAL, KIF5C, SCN2A, GRIN2A, BSN, SERPING1, EXD1, BTBD9, LPCAT4, EGFLAM, DOC2A, NPC2, SSTR3, TFPI, RYR2, CMIP, UNC13C, SH3GL2, KIAA1107, NCR3LG1, KIF4A, PLCXD3, ARHGEF28, CACNB1, CACNB2, CACNB3, FAM19A2, FAM19A1, CACNB4, FAM19A4, SERPINH1, C1ORF54, VWA5B2, CAS…	3.91318e-25	3.8697e-24
TAXCREB	1367	MEF2C, SCN3B, OR8S1, CDH22, GRIN2B, GRIN2C, RPLP0, C17ORF96, INA, TMEFF2, BARHL1, NODAL, GRIN2A, BSN, OLFML2A, SERPING1, F7, EXD1, HLA-DQA2, BTBD9, HLA-DQA1, LPCAT4, SSTR2, DOC2A, SSTR3, ARFGEF3, SSTR1, MAPK9, RYR2, CMIP, UNC13C, UNC13A, SH3GL2, NCR3LG1, KIF4A, PLCXD3, ARHGEF28, DNAH17, CACNB1, CACNB2, CACNB3, FAM19A1, CACNB4, MYBL2, RAC2, TMEM125, CASZ1, POTEG, LFNG, PPP2R2C, POTEF, POTEE, SGIP1…	5.84149e-25	5.47255e-24
PPARG	1958	MEF2C, GDA, SCN3B, OSMR, DIRAS2, MAP3K9, RPLP0, VNN1, RAB27B, LRRC7, VNN2, RAB27A, TMEFF2, CYP1A1, SCN2B, BARHL1, PTBP1, SCN2A, BSN, BTBD9, EGFLAM, DOC2A, TFPI, NCR3LG1, ARHGEF28, DNAH17, CACNB1, CACNB2, FAM19A2, CACNB3, CACNB4, FAM19A1, RCC1, FAM19A4, UPK1B, CCSER1, HLA-DOA, LFNG, ARHGEF39, CYP46A1, NDC80, GAS7, CAMK2N1, EIF4E1B, PARP9, RGS4, HPCA, RGS7, GRIP1, NUAK1, EZH2, PCP4L1, YBX3, MMP25, …	7.90341e-25	7.03404e-24
OLF1	1163	OSMR, CDH22, GRIN2B, GRIN2C, MAP3K9, RPLP0, SERPINE1, LRRC7, C17ORF96, TMEFF2, SCN2B, KIF5A, BARHL1, KIF5C, GRIN2A, BSN, OLFML2A, EXD1, TMEM130, EGFLAM, DOC2A, RYR2, CMIP, UNC13C, UNC13A, KIF4A, ARHGEF28, DNAH17, CACNB1, BCL2L2, CACNB3, CACNB4, FAM19A4, C1ORF54, SULT4A1, VWA5B2, UPK1B, CASZ1, POTEG, LFNG, SGIP1, ARHGEF33, MYADML2, NDC80, KIF3C, GAS7, CAMK2N1, UQCRHL, DUSP26, HPCA, PLCXD2, OPRM1, …	9.03158e-25	7.65534e-24
LHX3	964	MEF2C, GDA, SCN3B, CRHBP, GRIN3A, CDH22, DIRAS2, GRIN2B, RAB27B, LRRC7, INA, SH3GL3, TMEFF2, BARHL1, SCN2A, KIF5C, GRIN2A, BTBD9, EGFLAM, ARFGEF3, SSTR1, RYR2, MAPK9, UNC13C, SH3GL2, KIAA1107, KIF4A, ARHGEF28, CACNB1, CACNB2, FAM19A2, FAM19A1, CACNB4, FAM19A4, MYBL2, VWA5B2, CKLF, CASZ1, CCSER1, PPP2R2C, SGIP1, ARHGEF33, KIF3A, SERPINI1, GAS7, CAMK2N1, BTBD16, AKNAD1, RGS4, RGS7, PLCXD2, OPRM1, Z…	1.36012e-23	1.10046e-22
NF1	976	PDP1, MEF2C, GDA, B2M, CDH22, DIRAS2, RPLP0, LRRC7, C17ORF96, INA, SH3GL3, TMEFF2, KIF5C, GRIN2A, OLFML2A, BSN, ESPL1, F7, BTBD9, LPCAT4, NPC2, EGFLAM, ARFGEF3, CMIP, UNC13C, SH3GL2, KIAA1107, NCR3LG1, DNAH17, ARHGEF28, CACNB2, CACNB3, BCL2L2, CACNB4, SERPINH1, VWA5B2, CASZ1, LFNG, PPP2R2C, SGIP1, ARHGEF33, ARHGEF39, SERPINI1, GAS7, MAB21L3, PLCXD2, OPRM1, KCNAB2, ELF4, GRIP1, FGF9, NUAK1, DPP10,…	1.64516e-23	1.27321e-22
SEF1	1280	PDP1, MEF2C, GDA, SCN3B, CRHBP, CDH22, GRIN2B, GRIN2C, MAP3K9, RPLP0, SERPINE1, LRRC7, RAB27A, C17ORF96, TMEFF2, SCN2B, KIF5A, BARHL1, PTBP1, GRIN2A, BSN, OLFML2A, ESPL1, F7, EXD1, TMEM130, BTBD9, LPCAT4, NPC2, SSTR3, RYR2, MAPK9, CMIP, UNC13C, UNC13A, NCR3LG1, KIF4A, ARHGEF28, DNAH17, CACNB1, BCL2L2, CACNB3, FAM19A2, FAM19A1, CACNB4, FAM19A4, MYBL2, C1ORF54, VWA5B2, TMEM125, CASZ1, PABPC3, CCSER…	1.67801e-23	1.24453e-22
P300	974	PDP1, OSMR, SCN3B, CRHBP, GRIN3A, CDH22, GRIN2B, GRIN2C, LRRC7, INA, TMEFF2, KIF5A, BARHL1, SCN2A, KIF5C, BSN, ESPL1, EXD1, TMEM130, HLA-DQA2, BTBD9, LPCAT4, DOC2A, EGFLAM, ARFGEF3, CMIP, PLCXD3, DNAH17, ARHGEF28, CACNB1, CACNB2, CACNB3, BCL2L2, FAM19A2, FAM19A1, CACNB4, C1ORF54, CASZ1, HLA-DOA, POTEF, PPP2R2C, SGIP1, ARHGEF33, KIF3A, CYP46A1, ARHGEF39, MYADML2, SERPINI1, EMILIN2, GAS7, UQCRHL, S…	5.85066e-23	4.16567e-22
AHRARNT	1318	MEF2C, PDP1, SCN3B, OSMR, GRIN3A, CDH22, DIRAS2, GRIN2B, GRIN2C, MAP3K9, RPLP0, VNN1, C17ORF96, INA, SH3GL3, TMEFF2, CYP1A1, SCN2B, KIF5A, BARHL1, NODAL, PTBP1, SCN2A, GRIN2A, BSN, OLFML2A, ESPL1, F7, BTBD9, LPCAT4, EGFLAM, DOC2A, NPC2, SSTR3, ARFGEF3, SSTR1, MAPK9, RYR2, CMIP, UNC13C, UNC13A, KIF4A, ARHGEF28, DNAH17, CACNB1, BCL2L2, CACNB3, FAM19A1, CACNB4, C1ORF54, VWA5B2, UPK1B, CASZ1, CCSER1,…	8.94855e-23	6.12632e-22
TAL1ALPHAE47	582	MEF2C, PLEKHM3, TUBB2A, STRC, FSTL4, GRIN3A, CDH22, GRIN2B, PPP1R1B, PPP1R1A, MAP3K9, CDCA3, C17ORF96, TMEFF2, NODAL, TTC7B, KIF5C, GRIN2A, BSN, PTPRT, PCLO, BTBD9, TMEM132D, SSTR4, ADAMTS7, ADAMTS6, ADAMTS9, SSTR3, EGFLAM, ADAMTS8, HNF4A, ST14, CD164L2, SMPX, ST18, TM6SF2, KIAA1107, MGAT5B, ERBB4, CACNB1, FAM19A2, CACNB4, FAM19A1, MYBL2, SORCS2, SORCS3, ADCYAP1, VWA5B2, CASZ1, IQSEC3, POTEF, PLT…	1.4888e-22	9.81506e-22
TCF11	1273	MEF2C, PDP1, OSMR, CRHBP, GRIN3A, GRIN2B, GRIN2C, MAP3K9, SERPINE1, VNN1, RAB27B, LRRC7, SH3GL3, SCN2B, KIF5A, NODAL, PTBP1, KIF5C, SCN2A, GRIN2A, BSN, OLFML2A, ESPL1, F7, BTBD9, LPCAT4, SSTR2, EGFLAM, NPC2, ARFGEF3, SSTR1, RYR2, MAPK9, CMIP, UNC13C, UNC13A, SH3GL2, KIAA1107, NCR3LG1, KIF4A, PLCXD3, ARHGEF28, DNAH17, CACNB1, CACNB2, CACNB3, FAM19A2, FAM19A1, CACNB4, FAM19A4, MYBL2, SERPINH1, C1OR…	2.06131e-22	1.31041e-21
ROAZ	1157	GDA, SCN3B, CDH22, GRIN2B, GRIN2C, RPLP0, SCN2B, KIF5A, BARHL1, NODAL, KIF5C, SCN2A, GRIN2A, BSN, ESPL1, SERPING1, TMEM130, HLA-DQA2, HLA-DQA1, EGFLAM, NPC2, SSTR1, RYR2, CMIP, UNC13A, KIF4A, DNAH17, CACNB2, BCL2L2, CACNB3, FAM19A1, CACNB4, SERPINH1, C1ORF54, VWA5B2, TMEM125, CASZ1, CCSER1, POTEG, HLA-DOA, LFNG, POTEF, POTEE, ARHGEF39, CYP46A1, MYADML2, GAS7, EIF4E1B, DUSP26, RGS7, PLCXD2, ZNF536…	2.16384e-22	1.32815e-21
ER	1272	MEF2C, GDA, GRIN3A, CDH22, TMEM144, GRIN2B, GRIN2C, MAP3K9, RPLP0, SERPINE1, RAB27B, LRRC7, TMEFF2, KIF5A, PTBP1, KIF5C, SCN2A, GRIN2A, BSN, OLFML2A, F7, BTBD9, LPCAT4, SSTR4, SSTR2, EGFLAM, ARFGEF3, RYR2, MAPK9, CMIP, UNC13C, UNC13A, SH3GL2, HLA-DRA, NCR3LG1, KIF4A, PLCXD3, ARHGEF28, DNAH17, CACNB1, CACNB2, BCL2L2, FAM19A2, FAM19A1, CACNB4, FAM19A4, SERPINH1, VWA5B2, TMEM125, CASZ1, CCSER1, LFNG…	4.40331e-22	2.61263e-21
NFKAPPAB	927	SCN3B, B2M, CDH22, GRIN2B, MAP3K9, RPLP0, VNN1, VNN2, C17ORF96, SH3GL3, NODAL, KIF5C, GRIN2A, OLFML2A, BSN, SERPING1, HLA-DQA1, DOC2A, CMIP, SH3GL2, UNC13A, HLA-DRA, KIF4A, DNAH17, ARHGEF28, CACNB1, CACNB3, BCL2L2, FAM19A1, CACNB4, MYBL2, SERPINH1, RAC2, VWA5B2, TMEM125, CASZ1, CCSER1, LFNG, PPP2R2C, SGIP1, KIF3A, CYP46A1, ARHGEF39, MYADML2, EMILIN2, GAS7, KIF3C, CAMK2N1, EIF4E1B, SEPT12, MAB21L3…	4.9495e-22	2.84197e-21
RORA1	1132	PDP1, MEF2C, GDA, GRIN3A, CDH22, GRIN2B, RAB27B, LRRC7, RAB27A, SH3GL3, TMEFF2, SCN2B, BARHL1, SCN2A, GRIN2A, OLFML2A, BSN, BTBD9, LPCAT4, EGFLAM, DOC2A, NPC2, SSTR1, RYR2, UNC13C, UNC13A, KIAA1107, KIF4A, PLCXD3, DNAH17, CACNB1, CACNB2, BCL2L2, FAM19A2, FAM19A1, CACNB4, FAM19A4, SERPINH1, C1ORF54, CASZ1, CCSER1, POTEG, POTEF, POTEE, SGIP1, ARHGEF33, EMILIN2, GAS7, UQCRHL, BTBD16, RGS7, PLCXD2, Z…	1.17306e-21	6.52513e-21
RP58	1291	MEF2C, GDA, SCN3B, OSMR, CRHBP, GRIN3A, CDH22, GRIN2B, GRIN2C, RPLP0, VNN2, C17ORF96, SH3GL3, TMEFF2, SCN2B, KIF5A, PDPN, BARHL1, NODAL, KIF5C, GRIN2A, BSN, ESPL1, BTBD9, EGFLAM, DOC2A, NPC2, ARFGEF3, RYR2, CMIP, UNC13C, NCR3LG1, KIF4A, ARHGEF28, CACNB1, CACNB2, CACNB3, FAM19A2, FAM19A1, CACNB4, FAM19A4, MYBL2, SERPINH1, C1ORF54, VWA5B2, UPK1B, CASZ1, CCSER1, LFNG, PPP2R2C, SGIP1, ARHGEF33, ARHGE…	1.44802e-21	7.81054e-21
NRSF	1326	MEF2C, SCN3B, CRHBP, GRIN3A, CDH22, GRIN2B, GRIN2C, MAP3K9, RPLP0, SERPINE1, LRRC7, C17ORF96, INA, TMEFF2, SCN2B, KIF5A, BARHL1, NODAL, KIF5C, SCN2A, GRIN2A, BSN, ESPL1, HLA-DQA2, BTBD9, HLA-DQA1, LPCAT4, SSTR4, EGFLAM, DOC2A, NPC2, SSTR1, RYR2, MAPK9, CMIP, UNC13A, KIAA1107, NCR3LG1, KIF4A, PLCXD3, DNAH17, CACNB1, CACNB2, BCL2L2, CACNB3, CACNB4, FAM19A4, SERPINH1, C1ORF54, SULT4A1, VWA5B2, TMEM1…	1.5736e-21	8.23826e-21
MZF1	1215	MEF2C, SCN3B, GRIN3A, GRIN2B, GRIN2C, MAP3K9, LRRC7, C17ORF96, TMEFF2, CYP1A1, SCN2B, KIF5A, BARHL1, NODAL, KIF5C, SCN2A, GRIN2A, BSN, OLFML2A, ESPL1, LPCAT4, EGFLAM, DOC2A, SSTR3, ARFGEF3, RYR2, MAPK9, CMIP, UNC13C, UNC13A, KIF4A, PLCXD3, DNAH17, CACNB1, CACNB2, BCL2L2, CACNB3, FAM19A2, FAM19A1, CACNB4, FAM19A4, C1ORF54, RAC2, VWA5B2, UPK1B, CASZ1, CCSER1, LFNG, PPP2R2C, SGIP1, ARHGEF33, KIF3A, …	1.86725e-21	9.49628e-21
NFE2	920	MEF2C, OSMR, SCN3B, GRIN3A, CDH22, GRIN2B, MAP3K9, RPLP0, VNN1, LRRC7, TMEFF2, KIF5A, BARHL1, SCN2A, KIF5C, GRIN2A, OLFML2A, BSN, ESPL1, BTBD9, LPCAT4, DOC2A, NPC2, EGFLAM, ARFGEF3, SSTR1, RYR2, CMIP, UNC13C, SH3GL2, NCR3LG1, KIF4A, CACNB1, FAM19A2, CACNB4, SERPINH1, VWA5B2, CASZ1, CCSER1, LFNG, PPP2R2C, SGIP1, CYP46A1, ARHGEF39, MYADML2, SERPINI1, GAS7, KIF3C, UQCRHL, RGS4, HPCA, MAB21L3, PLCXD2…	4.06025e-21	2.00757e-20
GFI1	1118	MEF2C, CRHBP, GRIN3A, CDH22, GRIN2B, MAP3K9, VNN1, RAB27B, C17ORF96, TMEFF2, CYP1A1, KIF5A, KIF5C, SCN2A, GRIN2A, OLFML2A, BSN, ESPL1, EXD1, TMEM130, BTBD9, SSTR2, EGFLAM, ARFGEF3, SSTR1, RYR2, UNC13C, KIF4A, ARHGEF28, CACNB1, CACNB2, CACNB3, FAM19A2, FAM19A1, CACNB4, FAM19A4, C1ORF54, VWA5B2, UPK1B, CASZ1, CCSER1, SGIP1, KIF3A, CYP46A1, NDC80, EMILIN2, KIF3C, GAS7, EIF4E1B, SEPT12, RGS4, AKNAD1,…	4.44522e-21	2.13851e-20
BRACH	1358	MEF2C, PDP1, GDA, OSMR, GRIN3A, CDH22, GRIN2B, RPLP0, SERPINE1, LRRC7, VNN2, C17ORF96, INA, SH3GL3, TMEFF2, CYP1A1, PDPN, KIF5C, SCN2A, GRIN2A, BSN, OLFML2A, SERPING1, TMEM130, BTBD9, LPCAT4, SSTR4, EGFLAM, DOC2A, ARFGEF3, SSTR1, RYR2, CMIP, UNC13C, UNC13A, SH3GL2, KIF4A, PLCXD3, ARHGEF28, DNAH17, CACNB1, CACNB2, CACNB3, FAM19A2, FAM19A1, CACNB4, FAM19A4, SERPINH1, TMEM125, UPK1B, CASZ1, PABPC3, …	4.79066e-21	2.24404e-20
PAX4	1862	MEF2C, GDA, SCN3B, B2M, DIRAS2, MAP3K9, RPLP0, VNN1, RAB27B, LRRC7, RAB27A, TMEFF2, CYP1A1, SCN2B, BARHL1, PTBP1, SCN2A, BSN, BTBD9, EGFLAM, DOC2A, HLA-DRA, NCR3LG1, ARHGEF28, DNAH17, CACNB1, CACNB2, FAM19A2, CACNB3, CACNB4, FAM19A1, FAM19A4, MYBL2, UPK1B, CCSER1, LFNG, ARHGEF33, ARHGEF39, CYP46A1, NDC80, GAS7, CAMK2N1, DUSP26, HPCA, RGS7, GRIP1, NUAK1, EZH2, PCP4L1, YBX3, LRRC17, SCIMP, MMP25, Y…	6.04313e-21	2.75815e-20
PAX2	1434	MEF2C, SCN3B, GRIN3A, CDH22, GRIN2B, GRIN2C, MAP3K9, RPLP0, SERPINE1, TMEFF2, CYP1A1, SCN2B, BARHL1, PTBP1, KIF5C, SCN2A, GRIN2A, BSN, HLA-DQA2, BTBD9, LPCAT4, SSTR4, SSTR2, DOC2A, NPC2, ARFGEF3, SSTR1, TFPI, MAPK9, RYR2, CMIP, UNC13C, UNC13A, NCR3LG1, KIF4A, PLCXD3, ARHGEF28, DNAH17, CACNB1, CACNB2, BCL2L2, CACNB3, FAM19A2, FAM19A1, CACNB4, FAM19A4, MYBL2, SERPINH1, C1ORF54, VWA5B2, CASZ1, PABPC…	9.74353e-21	4.33587e-20
HNF1	1374	MEF2C, PDP1, GDA, OSMR, GRIN3A, CDH22, TMEM144, GRIN2B, GRIN2C, MAP3K9, VNN1, LRRC7, VNN2, SH3GL3, TMEFF2, SCN2B, KIF5A, BARHL1, PTBP1, KIF5C, SCN2A, GRIN2A, BSN, EXD1, BTBD9, LPCAT4, EGFLAM, NPC2, ARFGEF3, SSTR1, RYR2, CMIP, UNC13C, SH3GL2, KIAA1107, PLCXD3, ARHGEF28, DNAH17, CACNB2, FAM19A2, FAM19A1, CACNB4, FAM19A4, C1ORF54, VWA5B2, UPK1B, CASZ1, PABPC3, CCSER1, POTEG, LFNG, PPP2R2C, POTEF, PO…	1.24088e-20	5.38724e-20
MYCMAX	1532	MEF2C, GDA, CRHBP, GRIN3A, CDH22, GRIN2B, GRIN2C, RPLP0, SERPINE1, RAB27B, LRRC7, VNN2, C17ORF96, INA, SH3GL3, TMEFF2, PDPN, BARHL1, NODAL, PTBP1, KIF5C, GRIN2A, BSN, OLFML2A, ESPL1, F7, TMEM130, BTBD9, HLA-DQA1, LPCAT4, SSTR4, EGFLAM, DOC2A, SSTR3, ARFGEF3, MAPK9, RYR2, CMIP, UNC13C, UNC13A, HLA-DRA, KIF4A, PLCXD3, ARHGEF28, DNAH17, CACNB1, CACNB2, BCL2L2, CACNB3, FAM19A2, FAM19A1, RCC1, FAM19A4…	1.5827e-20	6.70761e-20
USF	1437	MEF2C, GDA, CDH22, TMEM144, GRIN2B, GRIN2C, MAP3K9, RPLP0, SERPINE1, VNN1, RAB27B, LRRC7, C17ORF96, TMEFF2, CYP1A1, SCN2B, KIF5A, BARHL1, PTBP1, KIF5C, SCN2A, GRIN2A, BSN, OLFML2A, ESPL1, F7, HLA-DQA2, BTBD9, HLA-DQA1, LPCAT4, SSTR4, EGFLAM, DOC2A, SSTR3, ARFGEF3, RYR2, CMIP, UNC13C, UNC13A, HLA-DRA, KIF4A, ARHGEF28, DNAH17, CACNB1, CACNB2, BCL2L2, FAM19A2, FAM19A4, MYBL2, SERPINH1, C1ORF54, VWA5…	1.61805e-20	6.69796e-20
HOXA3	1054	PDP1, MEF2C, GDA, SCN3B, OSMR, GRIN3A, CDH22, GRIN2B, SERPINE1, LRRC7, INA, TMEFF2, SCN2B, KIF5A, PTBP1, KIF5C, SCN2A, GRIN2A, BSN, ESPL1, BTBD9, LPCAT4, DOC2A, NPC2, SSTR3, EGFLAM, ARFGEF3, SSTR1, RYR2, CMIP, UNC13C, SH3GL2, UNC13A, KIF4A, PLCXD3, DNAH17, ARHGEF28, CACNB2, CACNB3, FAM19A2, FAM19A1, CACNB4, FAM19A4, MYBL2, VWA5B2, CKLF, CASZ1, PABPC3, CCSER1, POTEG, POTEF, POTEE, ARHGEF33, MYADML…	2.75952e-20	1.11635e-19
HFH3	1034	MEF2C, GDA, OSMR, GRIN3A, CDH22, GRIN2B, LRRC7, SH3GL3, TMEFF2, SCN2B, KIF5A, PTBP1, KIF5C, SCN2A, GRIN2A, BSN, ESPL1, BTBD9, SSTR2, DOC2A, NPC2, EGFLAM, ARFGEF3, SSTR1, RYR2, MAPK9, UNC13C, SH3GL2, UNC13A, KIF4A, PLCXD3, DNAH17, ARHGEF28, CACNB2, FAM19A2, FAM19A1, CACNB4, FAM19A4, C1ORF54, CASZ1, CCSER1, SGIP1, ARHGEF33, KIF3A, MOBP, CYP46A1, MYADML2, GAS7, EIF4E1B, RGS1, AKNAD1, HPCA, RGS7, MAB…	4.11866e-20	1.62916e-19
TGIF	1068	MEF2C, GDA, OSMR, CRHBP, GRIN3A, CDH22, TMEM144, GRIN2B, RPLP0, VNN1, RAB27B, LRRC7, C17ORF96, TMEFF2, PTBP1, KIF5C, SCN2A, GRIN2A, OLFML2A, BSN, ESPL1, TMEM130, BTBD9, SSTR4, SSTR3, EGFLAM, ARFGEF3, TFPI, RYR2, MAPK9, CMIP, UNC13C, SH3GL2, KIF4A, PLCXD3, DNAH17, ARHGEF28, CACNB1, CACNB2, CACNB3, FAM19A2, FAM19A1, CACNB4, FAM19A4, SERPINH1, C1ORF54, VWA5B2, CASZ1, PABPC3, CCSER1, LFNG, SGIP1, CYP…	4.19572e-20	1.62356e-19
MIF1	1066	PDP1, MEF2C, SCN3B, GRIN3A, CDH22, GRIN2B, GRIN2C, MAP3K9, RPLP0, LRRC7, C17ORF96, INA, TMEFF2, SCN2B, BARHL1, GRIN2A, OLFML2A, BSN, ESPL1, F7, BTBD9, DOC2A, NPC2, SSTR3, EGFLAM, RYR2, CMIP, UNC13C, UNC13A, DNAH17, CACNB2, BCL2L2, CACNB3, MYBL2, C1ORF54, VWA5B2, TMEM125, CASZ1, PPP2R2C, SGIP1, ARHGEF33, KIF3A, CYP46A1, GAS7, EIF4E1B, BTBD16, HPCA, PLCXD2, ZNF536, ELF4, KCNAB1, GRIP1, FGF9, NUAK1,…	4.39912e-20	1.66605e-19
COMP1	1232	MEF2C, SCN3B, GRIN3A, GRIN2B, GRIN2C, MAP3K9, VNN1, RAB27B, LRRC7, C17ORF96, TMEFF2, BARHL1, NODAL, KIF5C, SCN2A, GRIN2A, OLFML2A, BSN, ESPL1, SERPING1, F7, BTBD9, LPCAT4, SSTR4, EGFLAM, ARFGEF3, SSTR1, RYR2, MAPK9, CMIP, UNC13C, SH3GL2, UNC13A, HLA-DRA, NCR3LG1, KIF4A, PLCXD3, ARHGEF28, DNAH17, CACNB1, CACNB2, BCL2L2, CACNB3, FAM19A2, FAM19A1, FAM19A4, MYBL2, SERPINH1, C1ORF54, VWA5B2, TMEM125, …	5.64373e-20	2.09288e-19
MYOGNF1	1175	PDP1, MEF2C, SCN3B, OR8S1, GRIN3A, B2M, CDH22, DIRAS2, GRIN2B, GRIN2C, MAP3K9, RPLP0, SERPINE1, LRRC7, INA, TMEFF2, SCN2B, KIF5C, SCN2A, GRIN2A, OLFML2A, BSN, ESPL1, BTBD9, LPCAT4, EGFLAM, NPC2, SSTR3, ARFGEF3, RYR2, MAPK9, UNC13C, SH3GL2, UNC13A, KIF4A, ARHGEF28, DNAH17, CACNB1, CACNB2, BCL2L2, CACNB3, FAM19A2, FAM19A1, CACNB4, C1ORF54, RAC2, VWA5B2, CASZ1, CCSER1, LFNG, SGIP1, ARHGEF33, KIF3A, …	8.09762e-20	2.94158e-19
STAT	903	MEF2C, OSMR, CRHBP, GRIN3A, GRIN2B, MAP3K9, LRRC7, RAB27A, TMEFF2, PDPN, SCN2A, GRIN2A, BSN, ESPL1, SERPING1, EXD1, BTBD9, EGFLAM, ARFGEF3, SSTR1, RYR2, CMIP, UNC13C, KIF4A, DNAH17, ARHGEF28, CACNB2, FAM19A2, FAM19A1, CACNB4, FAM19A4, MYBL2, CASZ1, CCSER1, KIF3A, NDC80, EMILIN2, GAS7, SEPT12, BTBD16, PARP9, DUSP26, RGS7, PLCXD2, OPRM1, ELF4, KCNAB1, FGF9, GRIP1, EZH2, DPP10, YBX3, PCP4L1, NBEA, S…	1.4457e-19	5.14668e-19
CREBP1	1184	PDP1, MEF2C, CRHBP, GRIN3A, B2M, CDH22, GRIN2B, MAP3K9, LRRC7, SH3GL3, TMEFF2, KIF5A, PTBP1, KIF5C, SCN2A, GRIN2A, OLFML2A, BSN, SERPING1, BTBD9, LPCAT4, EGFLAM, DOC2A, SSTR3, SSTR1, MAPK9, CMIP, UNC13C, SH3GL2, KIF4A, PLCXD3, ARHGEF28, DNAH17, CACNB1, CACNB2, BCL2L2, FAM19A2, FAM19A1, CACNB4, FAM19A4, C1ORF54, RAC2, TMEM125, CASZ1, PABPC3, CCSER1, POTEG, HLA-DOA, LFNG, PPP2R2C, POTEE, SGIP1, ARH…	2.51386e-19	8.77387e-19
SREBP1	1463	MEF2C, SCN3B, OSMR, GRIN3A, CDH22, TMEM144, DIRAS2, GRIN2B, GRIN2C, RPLP0, SERPINE1, VNN1, RAB27B, LRRC7, C17ORF96, SH3GL3, CYP1A1, KIF5A, PTBP1, KIF5C, SCN2A, GRIN2A, BSN, ESPL1, F7, EXD1, HLA-DQA2, BTBD9, LPCAT4, SSTR2, EGFLAM, DOC2A, SSTR3, ARFGEF3, MAPK9, RYR2, CMIP, UNC13C, UNC13A, SH3GL2, KIF4A, PLCXD3, ARHGEF28, DNAH17, CACNB1, CACNB2, BCL2L2, CACNB3, FAM19A2, FAM19A1, FAM19A4, MYBL2, C1OR…	3.8602e-19	1.32138e-18
IK3	1103	MEF2C, SCN3B, OSMR, CDH22, GRIN2B, GRIN2C, MAP3K9, RPLP0, RAB27B, LRRC7, INA, SH3GL3, TMEFF2, KIF5A, PDPN, PTBP1, KIF5C, SCN2A, GRIN2A, OLFML2A, BSN, ESPL1, TMEM130, BTBD9, DOC2A, EGFLAM, SSTR1, RYR2, MAPK9, CMIP, SH3GL2, UNC13A, KIF4A, DNAH17, CACNB1, CACNB2, FAM19A1, CACNB4, FAM19A4, MYBL2, TMEM125, UPK1B, CASZ1, CCSER1, LFNG, PPP2R2C, KIF3A, ARHGEF39, CYP46A1, EMILIN2, SERPINI1, GAS7, CAMK2N1,…	5.13453e-19	1.72443e-18
CDPCR3	1337	MEF2C, PDP1, GDA, CRHBP, GRIN3A, CDH22, GRIN2B, GRIN2C, RPLP0, VNN1, RAB27B, LRRC7, RAB27A, INA, TMEFF2, SCN2B, KIF5A, NODAL, PTBP1, KIF5C, SCN2A, BSN, TMEM130, BTBD9, SSTR2, EGFLAM, ARFGEF3, SSTR1, RYR2, CMIP, UNC13C, UNC13A, SH3GL2, HLA-DRA, KIF4A, PLCXD3, ARHGEF28, DNAH17, CACNB1, CACNB2, BCL2L2, CACNB3, FAM19A2, FAM19A1, CACNB4, FAM19A4, MYBL2, SERPINH1, C1ORF54, UPK1B, CASZ1, CCSER1, LFNG, S…	5.46993e-19	1.80305e-18
NFKB	1226	MEF2C, GDA, SCN3B, CRHBP, CDH22, GRIN2B, MAP3K9, RPLP0, SERPINE1, LRRC7, VNN2, SH3GL3, TMEFF2, BARHL1, KIF5C, SCN2A, GRIN2A, BSN, OLFML2A, SERPING1, TMEM130, BTBD9, LPCAT4, NPC2, SSTR3, SSTR1, RYR2, CMIP, UNC13C, UNC13A, SH3GL2, KIAA1107, KIF4A, ARHGEF28, DNAH17, CACNB2, BCL2L2, CACNB3, FAM19A1, CACNB4, MYBL2, SERPINH1, C1ORF54, RAC2, VWA5B2, CASZ1, CCSER1, SGIP1, ARHGEF33, KIF3A, ARHGEF39, CYP46…	6.0518e-19	1.95858e-18
RREB1	976	SCN3B, CDH22, GRIN2B, GRIN2C, MAP3K9, SERPINE1, VNN1, CYP1A1, SCN2B, KIF5A, BARHL1, PTBP1, KIF5C, GRIN2A, OLFML2A, BSN, TMEM130, HLA-DQA2, BTBD9, LPCAT4, HLA-DQA1, SSTR2, DOC2A, NPC2, ARFGEF3, RYR2, MAPK9, CMIP, SH3GL2, UNC13A, KIF4A, DNAH17, ARHGEF28, CACNB1, CACNB2, CACNB3, BCL2L2, FAM19A1, MYBL2, SERPINH1, C1ORF54, RAC2, VWA5B2, TMEM125, CKLF, CASZ1, LFNG, POTEF, SGIP1, ARHGEF33, CYP46A1, MYAD…	7.03229e-19	2.23526e-18
RORA2	1172	MEF2C, OSMR, GRIN3A, TMEM144, GRIN2B, MAP3K9, LRRC7, C17ORF96, SH3GL3, TMEFF2, CYP1A1, KIF5A, NODAL, KIF5C, SCN2A, GRIN2A, BSN, ESPL1, SERPING1, EXD1, TMEM130, BTBD9, LPCAT4, SSTR2, EGFLAM, ARFGEF3, TFPI, MAPK9, CMIP, SH3GL2, NCR3LG1, KIF4A, PLCXD3, ARHGEF28, DNAH17, CACNB1, CACNB2, BCL2L2, CACNB3, FAM19A2, FAM19A1, CACNB4, FAM19A4, C1ORF54, CASZ1, CCSER1, LFNG, PPP2R2C, SGIP1, EMILIN2, SERPINI1,…	1.18174e-18	3.69035e-18
FREAC3	1060	MEF2C, GDA, OSMR, SCN3B, GRIN2B, VNN1, LRRC7, INA, SH3GL3, TMEFF2, KIF5A, PDPN, PTBP1, KIF5C, SCN2A, GRIN2A, F7, BTBD9, LPCAT4, SSTR2, DOC2A, NPC2, SSTR3, EGFLAM, SSTR1, RYR2, MAPK9, CMIP, UNC13C, SH3GL2, PLCXD3, ARHGEF28, CACNB2, BCL2L2, CACNB3, FAM19A2, FAM19A1, CACNB4, FAM19A4, C1ORF54, TMEM125, CASZ1, CCSER1, LFNG, SGIP1, KIF3A, CYP46A1, EMILIN2, KIF3C, GAS7, CAMK2N1, RGS1, DUSP26, RGS4, RGS7…	1.8912e-18	5.80403e-18
HMX1	1132	PDP1, CDH22, DIRAS2, GRIN2B, GRIN2C, MAP3K9, RPLP0, C17ORF96, TMEFF2, SCN2B, BARHL1, NODAL, KIF5C, GRIN2A, BSN, TMEM130, EGFLAM, DOC2A, NPC2, ARFGEF3, RYR2, CMIP, UNC13C, SH3GL2, UNC13A, KIF4A, PLCXD3, DNAH17, ARHGEF28, CACNB1, CACNB2, BCL2L2, FAM19A2, FAM19A1, CACNB4, MYBL2, RCC1, SERPINH1, RAC2, TMEM125, CASZ1, LFNG, POTEF, ARHGEF33, KIF3A, KIF3C, GAS7, EIF4E1B, SEPT12, RGS1, HPCA, RGS7, MAB21L…	2.4364e-18	7.35049e-18
HEN1	1418	MEF2C, PDP1, OSMR, CRHBP, GRIN3A, CDH22, DIRAS2, GRIN2B, GRIN2C, MAP3K9, RPLP0, SERPINE1, VNN1, VNN2, RAB27A, C17ORF96, INA, SH3GL3, TMEFF2, SCN2B, BARHL1, SCN2A, GRIN2A, BSN, OLFML2A, ESPL1, SERPING1, F7, TMEM130, BTBD9, HLA-DQA1, LPCAT4, SSTR4, SSTR2, EGFLAM, DOC2A, NPC2, SSTR3, ARFGEF3, RYR2, CMIP, UNC13A, SH3GL2, ARHGEF28, DNAH17, CACNB1, CACNB2, BCL2L2, CACNB3, FAM19A2, FAM19A1, SERPINH1, SU…	2.59406e-18	7.69571e-18
XBP1	1221	MEF2C, CDH22, DIRAS2, GRIN2B, GRIN2C, MAP3K9, RPLP0, RAB27B, RAB27A, C17ORF96, INA, SH3GL3, TMEFF2, CYP1A1, SCN2B, BARHL1, PTBP1, KIF5C, SCN2A, GRIN2A, BSN, OLFML2A, F7, BTBD9, HLA-DQA1, LPCAT4, SSTR4, EGFLAM, DOC2A, SSTR3, ARFGEF3, RYR2, CMIP, UNC13C, UNC13A, SH3GL2, KIF4A, ARHGEF28, DNAH17, BCL2L2, CACNB3, FAM19A4, VWA5B2, TMEM125, CASZ1, PABPC3, CCSER1, POTEG, LFNG, POTEF, POTEE, SGIP1, KIF3A,…	2.80714e-18	8.19133e-18
COUP	1041	PDP1, MEF2C, GRIN3A, CDH22, GRIN2B, GRIN2C, RPLP0, VNN1, C17ORF96, CYP1A1, SCN2B, BARHL1, PTBP1, KIF5C, SCN2A, GRIN2A, BSN, ESPL1, F7, BTBD9, DOC2A, NPC2, SSTR3, EGFLAM, RYR2, CMIP, UNC13C, SH3GL2, NCR3LG1, KIF4A, DNAH17, ARHGEF28, CACNB1, CACNB2, BCL2L2, CACNB3, FAM19A2, FAM19A1, FAM19A4, SERPINH1, C1ORF54, TMEM125, CASZ1, PABPC3, CCSER1, LFNG, POTEF, SGIP1, ARHGEF33, CYP46A1, EMILIN2, GAS7, CAM…	3.13531e-18	9.00136e-18
OCT	1143	PDP1, MEF2C, GDA, SCN3B, OSMR, CRHBP, GRIN3A, CDH22, GRIN2B, VNN1, RAB27B, LRRC7, SH3GL3, TMEFF2, BARHL1, KIF5C, SCN2A, GRIN2A, OLFML2A, BSN, BTBD9, LPCAT4, EGFLAM, ARFGEF3, SSTR1, RYR2, UNC13C, SH3GL2, KIAA1107, NCR3LG1, KIF4A, ARHGEF28, CACNB1, CACNB2, BCL2L2, FAM19A2, FAM19A1, CACNB4, FAM19A4, CKLF, CASZ1, CCSER1, HLA-DOA, SGIP1, KIF3A, ARHGEF39, CYP46A1, EMILIN2, GAS7, CAMK2N1, RGS4, HPCA, RG…	3.52836e-18	9.96903e-18
NGFIC	781	PDP1, MEF2C, SCN3B, GRIN2B, C17ORF96, SH3GL3, TMEFF2, SCN2A, KIF5C, BSN, TMEM130, DOC2A, UNC13A, CACNB1, CACNB2, CACNB3, BCL2L2, CACNB4, FAM19A1, C1ORF54, VWA5B2, CASZ1, CCSER1, PPP2R2C, LFNG, ARHGEF33, CYP46A1, KIF3C, ZNF536, KCNAB2, FGF9, ELF4, PCP4L1, YBX1, SRPX, IL1RAP, IGFLR1, HYAL2, AIFM3, SH3PXD2A, CACNG8, TP53, CACNG3, CLIC1, MMP14, EPB41L3, C19ORF35, DOK3, KSR2, EPB41L1, CLIC5, THEM5, EP…	4.93495e-18	1.37253e-17
P53	1575	MEF2C, GDA, B2M, MAP3K9, RPLP0, RAB27B, VNN2, TMEFF2, SCN2B, BARHL1, PTBP1, SCN2A, BSN, BTBD9, DOC2A, EGFLAM, NCR3LG1, ARHGEF28, DNAH17, CACNB1, CACNB2, CACNB3, FAM19A2, FAM19A1, CACNB4, CKLF, UPK1B, CCSER1, LFNG, ARHGEF33, CYP46A1, ARHGEF39, GAS7, EIF4E1B, DUSP26, RGS4, HPCA, RGS7, NUAK1, EZH2, YBX3, SCIMP, IL1RAP, IGFLR1, SLC22A6, AIFM3, SLC22A8, ARHGEF19, CACNG3, CACNG2, MMP14, MYRIP, FANCD2, …	1.13035e-17	3.09543e-17
STAT5A	1389	MEF2C, PDP1, SCN3B, OSMR, GRIN3A, TMEM144, DIRAS2, GRIN2B, GRIN2C, MAP3K9, SERPINE1, RAB27B, LRRC7, INA, SH3GL3, TMEFF2, SCN2B, KIF5A, PTBP1, KIF5C, SCN2A, GRIN2A, BSN, ESPL1, F7, EXD1, BTBD9, LPCAT4, EGFLAM, DOC2A, NPC2, ARFGEF3, TFPI, MAPK9, RYR2, UNC13C, UNC13A, SH3GL2, KIAA1107, KIF4A, PLCXD3, ARHGEF28, DNAH17, CACNB1, BCL2L2, CACNB3, FAM19A2, FAM19A1, CACNB4, FAM19A4, MYBL2, SERPINH1, VWA5B2…	1.56396e-17	4.21795e-17
SOX9	1098	MEF2C, GDA, GRIN3A, CDH22, GRIN2B, SERPINE1, RAB27B, RAB27A, INA, TMEFF2, KIF5A, PDPN, BARHL1, KIF5C, GRIN2A, BSN, ESPL1, TMEM130, BTBD9, LPCAT4, SSTR4, EGFLAM, ARFGEF3, RYR2, CMIP, UNC13C, SH3GL2, UNC13A, KIAA1107, KIF4A, PLCXD3, DNAH17, ARHGEF28, CACNB1, CACNB2, BCL2L2, CACNB3, FAM19A2, FAM19A1, CACNB4, FAM19A4, MYBL2, VWA5B2, CASZ1, CCSER1, LFNG, PPP2R2C, SGIP1, CYP46A1, SERPINI1, GAS7, CAMK2N…	1.72917e-17	4.59392e-17
PAX3	1083	MEF2C, SCN3B, GRIN3A, CDH22, DIRAS2, GRIN2B, GRIN2C, MAP3K9, RPLP0, SERPINE1, C17ORF96, TMEFF2, CYP1A1, SCN2B, KIF5A, KIF5C, SCN2A, GRIN2A, OLFML2A, BSN, EXD1, BTBD9, LPCAT4, SSTR2, NPC2, SSTR3, EGFLAM, RYR2, MAPK9, CMIP, UNC13C, SH3GL2, UNC13A, KIAA1107, KIF4A, PLCXD3, DNAH17, ARHGEF28, CACNB2, BCL2L2, CACNB3, FAM19A2, FAM19A1, CACNB4, FAM19A4, SERPINH1, RAC2, VWA5B2, CKLF, CASZ1, CCSER1, CYP46A…	2.03806e-17	5.33493e-17
AP1FJ	771	MEF2C, GDA, GRIN3A, TMEM144, GRIN2B, RPLP0, SCN2A, KIF5C, GRIN2A, OLFML2A, BSN, ESPL1, F7, LPCAT4, BTBD9, EGFLAM, CMIP, SH3GL2, KIF4A, DNAH17, ARHGEF28, CACNB2, FAM19A2, CACNB4, FAM19A1, CKLF, UPK1B, CASZ1, POTEG, POTEF, POTEE, SGIP1, CYP46A1, MYADML2, EMILIN2, GAS7, KIF3C, CAMK2N1, EIF4E1B, HPCA, PLCXD2, OPRM1, ZNF536, KCNAB2, GRIP1, KCNAB1, EZH2, DPP10, MMP25, SNPH, IL1RAP, DPEP1, SH3PXD2A, SLC…	1.38125e-16	3.33067e-16
FOXO3	719	MEF2C, GDA, PLEKHM3, SLC9A6, SERTM1, OSMR, FSTL4, GRIN3A, HOXD10, PGR, ADTRP, HTR1B, HTR1A, GRIN2B, PPP1R1A, WDR76, FSTL5, CDCA2, GNG3, RAB27B, LRRC7, VNN2, NWD2, TMEFF2, PDPN, KIF5A, CDHR1, SCN2A, KIF5C, GRIN2A, PTPRR, OLFML2A, PTPRT, EXD1, PCLO, BTBD9, TMEM132D, PDCD1LG2, CTNNA3, ADAMTS6, ADAMTS9, SSTR3, ARFGEF3, SMPX, RYR2, TGIF1, RPS10, CMIP, ST18, UNC13C, SH3GL2, PLCXD3, RTP4, ERBB4, GNAI1, …	1.47695e-16	3.33067e-16
FREAC7	1192	PDP1, MEF2C, GDA, OSMR, GRIN3A, GRIN2B, SERPINE1, VNN1, RAB27B, LRRC7, SH3GL3, TMEFF2, KIF5A, PTBP1, KIF5C, SCN2A, GRIN2A, BSN, OLFML2A, ESPL1, F7, EXD1, BTBD9, EGFLAM, DOC2A, NPC2, ARFGEF3, SSTR1, RYR2, MAPK9, CMIP, UNC13C, SH3GL2, KIAA1107, PLCXD3, ARHGEF28, CACNB2, CACNB3, FAM19A2, FAM19A1, CACNB4, FAM19A4, UPK1B, CASZ1, CCSER1, POTEF, PPP2R2C, POTEE, SGIP1, KIF3A, MOBP, EMILIN2, GAS7, BTBD16,…	1.57461e-16	3.33067e-16
MYB	1112	PDP1, MEF2C, SCN3B, CRHBP, CDH22, TMEM144, GRIN2B, MAP3K9, VNN1, C17ORF96, SH3GL3, TMEFF2, SCN2B, PTBP1, KIF5C, SCN2A, GRIN2A, BSN, BTBD9, SSTR2, DOC2A, NPC2, SSTR3, RYR2, UNC13C, SH3GL2, UNC13A, PLCXD3, ARHGEF28, DNAH17, BCL2L2, CACNB3, FAM19A2, FAM19A1, MYBL2, CKLF, UPK1B, CASZ1, PABPC3, HLA-DOA, LFNG, NDC80, EMILIN2, EIF4E1B, SEPT12, DUSP26, RGS4, RGS7, KCNAB2, ELF4, KCNAB1, FGF9, NUAK1, DPP10…	1.68821e-16	5.55112e-16
STAT3	1159	PDP1, MEF2C, GDA, OSMR, CRHBP, GRIN3A, CDH22, GRIN2B, MAP3K9, SERPINE1, RAB27B, VNN2, RAB27A, C17ORF96, SH3GL3, SCN2B, KIF5A, BARHL1, KIF5C, SCN2A, GRIN2A, BSN, ESPL1, BTBD9, LPCAT4, ARFGEF3, RYR2, MAPK9, CMIP, UNC13C, SH3GL2, KIAA1107, KIF4A, ARHGEF28, DNAH17, CACNB1, CACNB2, CACNB3, FAM19A1, CACNB4, FAM19A4, TMEM125, CASZ1, PPP2R2C, ARHGEF33, MYADML2, KIF3C, EIF4E1B, PARP9, HPCA, RGS7, PLCXD2, …	1.75334e-16	5.55112e-16
HSF2	1035	MEF2C, GDA, OSMR, SCN3B, CRHBP, GRIN3A, CDH22, GRIN2B, GRIN2C, MAP3K9, RPLP0, SERPINE1, VNN1, LRRC7, SH3GL3, TMEFF2, CYP1A1, KIF5A, PDPN, KIF5C, SCN2A, GRIN2A, OLFML2A, BSN, TMEM130, BTBD9, SSTR4, NPC2, EGFLAM, RYR2, MAPK9, CMIP, UNC13C, KIF4A, PLCXD3, DNAH17, ARHGEF28, CACNB1, CACNB2, FAM19A2, FAM19A1, CACNB4, FAM19A4, MYBL2, VWA5B2, CASZ1, CCSER1, LFNG, PPP2R2C, SGIP1, KIF3A, MOBP, NDC80, EMILI…	3.23402e-16	7.77156e-16
NKX61	1069	PDP1, MEF2C, GDA, SCN3B, GRIN3A, TMEM144, GRIN2B, MAP3K9, RAB27B, LRRC7, INA, SH3GL3, TMEFF2, KIF5A, BARHL1, KIF5C, SCN2A, GRIN2A, BSN, BTBD9, LPCAT4, EGFLAM, ARFGEF3, SSTR1, RYR2, UNC13C, SH3GL2, KIAA1107, KIF4A, PLCXD3, DNAH17, ARHGEF28, CACNB2, FAM19A2, FAM19A1, CACNB4, FAM19A4, C1ORF54, UPK1B, CASZ1, CCSER1, LFNG, PPP2R2C, SGIP1, ARHGEF33, CYP46A1, EMILIN2, SERPINI1, CAMK2N1, AKNAD1, RGS7, PL…	3.30327e-16	7.77156e-16
GATA	1102	MEF2C, GDA, SCN3B, OSMR, CRHBP, GRIN3A, CDH22, GRIN2B, MAP3K9, RAB27B, LRRC7, RAB27A, TMEFF2, KIF5A, PDPN, BARHL1, KIF5C, SCN2A, GRIN2A, OLFML2A, BSN, SERPING1, EXD1, BTBD9, EGFLAM, RYR2, UNC13C, SH3GL2, KIF4A, PLCXD3, DNAH17, ARHGEF28, CACNB1, CACNB2, FAM19A2, FAM19A1, FAM19A4, C1ORF54, TMEM125, CASZ1, CCSER1, LFNG, PPP2R2C, SGIP1, ARHGEF33, MOBP, CYP46A1, SERPINI1, KIF3C, GAS7, UQCRHL, BTBD16, …	3.42083e-16	7.77156e-16
TBP	895	PDP1, MEF2C, GDA, OSMR, GRIN3A, CDH22, GRIN2B, RPLP0, MAP3K9, RAB27B, LRRC7, SH3GL3, TMEFF2, KIF5A, SCN2A, GRIN2A, BTBD9, ARFGEF3, TFPI, RYR2, MAPK9, CMIP, UNC13C, SH3GL2, KIAA1107, PLCXD3, KIF4A, ARHGEF28, CACNB2, CACNB3, FAM19A2, FAM19A1, CACNB4, FAM19A4, C1ORF54, VWA5B2, CASZ1, PABPC3, CCSER1, PPP2R2C, SGIP1, KIF3A, MYADML2, SERPINI1, GAS7, CAMK2N1, AKNAD1, RGS7, PLCXD2, OPRM1, ZNF536, ELF4, K…	3.51142e-16	7.77156e-16
ZID	1165	PDP1, MEF2C, GRIN3A, CDH22, GRIN2B, GRIN2C, MAP3K9, RPLP0, SERPINE1, VNN1, C17ORF96, SCN2B, KIF5A, NODAL, KIF5C, SCN2A, GRIN2A, OLFML2A, ESPL1, BTBD9, LPCAT4, EGFLAM, DOC2A, ARFGEF3, RYR2, UNC13C, SH3GL2, NCR3LG1, DNAH17, CACNB1, CACNB2, BCL2L2, CACNB3, FAM19A2, FAM19A1, CACNB4, MYBL2, C1ORF54, VWA5B2, CASZ1, POTEG, LFNG, POTEF, POTEE, ARHGEF39, CYP46A1, MYADML2, EMILIN2, SERPINI1, GAS7, UQCRHL, …	4.93462e-16	9.99201e-16
MEIS1BHOXA9	1225	PDP1, MEF2C, GDA, SCN3B, OSMR, CRHBP, GRIN3A, B2M, CDH22, TMEM144, GRIN2B, MAP3K9, RAB27B, LRRC7, VNN2, SH3GL3, TMEFF2, KIF5A, PDPN, BARHL1, NODAL, KIF5C, SCN2A, GRIN2A, BSN, OLFML2A, ESPL1, F7, TMEM130, HLA-DQA2, BTBD9, LPCAT4, EGFLAM, NPC2, SSTR3, ARFGEF3, SSTR1, RYR2, MAPK9, CMIP, UNC13C, SH3GL2, NCR3LG1, KIF4A, PLCXD3, ARHGEF28, CACNB2, CACNB3, FAM19A2, FAM19A1, CACNB4, FAM19A4, RCC1, TMEM125…	6.13479e-16	1.55431e-15
E2F	1378	MEF2C, PDP1, GDA, SCN3B, GRIN3A, CDH22, TMEM144, DIRAS2, GRIN2B, MAP3K9, RPLP0, SERPINE1, LRRC7, INA, SH3GL3, TMEFF2, CYP1A1, KIF5A, BARHL1, NODAL, KIF5C, SCN2A, GRIN2A, BSN, OLFML2A, ESPL1, F7, EXD1, BTBD9, SSTR4, SSTR2, RYR2, CMIP, UNC13A, KIF4A, PLCXD3, DNAH17, CACNB1, CACNB2, BCL2L2, CACNB3, FAM19A2, FAM19A1, CACNB4, FAM19A4, MYBL2, RCC1, SERPINH1, UPK1B, CASZ1, PABPC3, CCSER1, LFNG, PPP2R2C,…	6.28674e-16	1.44329e-15
AREB6	1979	MEF2C, GDA, SCN3B, OSMR, MAP3K9, RPLP0, LRRC7, TMEFF2, SCN2B, BARHL1, PTBP1, SCN2A, BSN, BTBD9, EGFLAM, DOC2A, HLA-DRA, NCR3LG1, ARHGEF28, DNAH17, CACNB1, CACNB2, FAM19A2, CACNB3, CACNB4, FAM19A1, MYBL2, FAM19A4, UPK1B, CCSER1, LFNG, ARHGEF33, ARHGEF39, CYP46A1, GAS7, EIF4E1B, RGS1, DUSP26, PARP9, HPCA, RGS7, GRIP1, NUAK1, EZH2, PCP4L1, YBX3, LRRC17, MMP25, GTSE1, YBX1, IL1RAP, IGFLR1, SLC22A6, S…	6.77988e-16	1.44329e-15
MEIS1	1136	MEF2C, CRHBP, GRIN3A, B2M, CDH22, TMEM144, GRIN2B, GRIN2C, MAP3K9, RPLP0, LRRC7, VNN2, TMEFF2, CYP1A1, KIF5A, PDPN, BARHL1, SCN2A, GRIN2A, BSN, HLA-DQA2, BTBD9, LPCAT4, SSTR4, EGFLAM, NPC2, ARFGEF3, RYR2, CMIP, UNC13C, UNC13A, KIF4A, CACNB2, BCL2L2, FAM19A2, FAM19A1, CACNB4, FAM19A4, MYBL2, SERPINH1, VWA5B2, TMEM125, CASZ1, SGIP1, KIF3A, ARHGEF39, SERPINI1, KIF3C, CAMK2N1, EIF4E1B, UQCRHL, RGS7, …	7.85076e-16	1.66533e-15
GATA2	877	MEF2C, GRIN3A, GRIN2B, GRIN2C, MAP3K9, RPLP0, SERPINE1, VNN1, C17ORF96, INA, TMEFF2, CYP1A1, KIF5A, KIF5C, GRIN2A, OLFML2A, BSN, LPCAT4, SSTR2, DOC2A, SSTR3, EGFLAM, SSTR1, RYR2, SH3GL2, UNC13A, NCR3LG1, PLCXD3, KIF4A, DNAH17, ARHGEF28, CACNB1, CACNB3, BCL2L2, CACNB4, FAM19A4, SERPINH1, C1ORF54, RAC2, VWA5B2, UPK1B, CASZ1, PABPC3, CCSER1, LFNG, ARHGEF33, KIF3A, MYADML2, EMILIN2, CAMK2N1, UQCRHL, …	8.29926e-16	1.66533e-15
FAC1	1159	PDP1, MEF2C, GDA, OSMR, GRIN3A, CDH22, GRIN2B, GRIN2C, MAP3K9, RPLP0, SERPINE1, LRRC7, SH3GL3, KIF5A, PTBP1, KIF5C, SCN2A, GRIN2A, BSN, EXD1, BTBD9, SSTR2, NPC2, ARFGEF3, RYR2, MAPK9, CMIP, UNC13C, SH3GL2, UNC13A, PLCXD3, ARHGEF28, DNAH17, CACNB2, BCL2L2, FAM19A2, FAM19A1, CACNB4, FAM19A4, RAC2, VWA5B2, CASZ1, CCSER1, POTEG, LFNG, PPP2R2C, SGIP1, ARHGEF33, MOBP, CYP46A1, MYADML2, SERPINI1, GAS7, …	9.19892e-16	1.88738e-15
FOXD3	863	PDP1, MEF2C, GRIN3A, GRIN2B, SERPINE1, VNN1, RAB27B, LRRC7, RAB27A, TMEFF2, CYP1A1, SCN2A, KIF5C, GRIN2A, OLFML2A, BSN, SERPING1, EXD1, BTBD9, SSTR4, SSTR2, EGFLAM, ARFGEF3, SSTR1, RYR2, CMIP, UNC13C, SH3GL2, KIAA1107, PLCXD3, KIF4A, ARHGEF28, CACNB2, BCL2L2, FAM19A2, CACNB4, FAM19A1, FAM19A4, UPK1B, CASZ1, CCSER1, MOBP, NDC80, GAS7, PARP9, AKNAD1, RGS7, PLCXD2, OPRM1, ZNF536, FGF9, NUAK1, GRIP1,…	9.62166e-16	2.10942e-15
FREAC4	1122	PDP1, MEF2C, GDA, CRHBP, GRIN3A, GRIN2B, RPLP0, RAB27B, LRRC7, TMEFF2, KIF5C, SCN2A, GRIN2A, BTBD9, LPCAT4, HLA-DQA1, EGFLAM, DOC2A, NPC2, ARFGEF3, TFPI, RYR2, CMIP, UNC13C, UNC13A, KIF4A, PLCXD3, ARHGEF28, CACNB2, BCL2L2, FAM19A2, FAM19A1, CACNB4, FAM19A4, C1ORF54, CASZ1, PABPC3, CCSER1, SGIP1, ARHGEF33, KIF3A, ARHGEF39, EMILIN2, KIF3C, GAS7, CAMK2N1, RGS1, RGS4, AKNAD1, HPCA, RGS7, PLCXD2, OPRM…	1.27817e-15	2.77556e-15
NFY	1191	PDP1, MEF2C, GRIN3A, B2M, CDH22, GRIN2B, GRIN2C, MAP3K9, RPLP0, RAB27B, LRRC7, C17ORF96, INA, SH3GL3, TMEFF2, PDPN, BARHL1, PTBP1, KIF5C, GRIN2A, BSN, ESPL1, EXD1, BTBD9, EGFLAM, DOC2A, NPC2, SSTR3, ARFGEF3, RYR2, MAPK9, CMIP, UNC13C, HLA-DRA, KIAA1107, KIF4A, PLCXD3, DNAH17, CACNB1, BCL2L2, CACNB3, FAM19A2, FAM19A1, CACNB4, FAM19A4, C1ORF54, VWA5B2, TMEM125, CASZ1, CCSER1, HLA-DOA, LFNG, PPP2R2C…	1.42574e-15	2.9976e-15
HNF3B	1015	MEF2C, GDA, OSMR, GRIN3A, CDH22, TMEM144, GRIN2B, GRIN2C, SERPINE1, VNN1, RAB27B, LRRC7, INA, TMEFF2, SCN2A, KIF5C, GRIN2A, OLFML2A, BSN, ESPL1, BTBD9, LPCAT4, SSTR2, NPC2, SSTR3, EGFLAM, ARFGEF3, SSTR1, RYR2, UNC13C, SH3GL2, UNC13A, KIF4A, PLCXD3, ARHGEF28, CACNB2, BCL2L2, FAM19A2, FAM19A1, CACNB4, FAM19A4, CASZ1, CCSER1, PPP2R2C, SGIP1, ARHGEF33, KIF3A, NDC80, KIF3C, BTBD16, AKNAD1, RGS7, MAB21…	1.60358e-15	3.10862e-15
EN1	1295	MEF2C, OR8S1, GRIN3A, CDH22, DIRAS2, GRIN2B, GRIN2C, MAP3K9, RPLP0, LRRC7, SH3GL3, TMEFF2, SCN2B, KIF5A, BARHL1, KIF5C, SCN2A, GRIN2A, BSN, OLFML2A, ESPL1, HLA-DQA2, BTBD9, LPCAT4, SSTR4, SSTR2, EGFLAM, DOC2A, ARFGEF3, SSTR1, TFPI, RYR2, MAPK9, CMIP, UNC13C, UNC13A, SH3GL2, KIF4A, PLCXD3, ARHGEF28, DNAH17, CACNB1, CACNB2, BCL2L2, FAM19A2, FAM19A1, CACNB4, FAM19A4, SERPINH1, C1ORF54, TMEM125, UPK1…	1.74077e-15	3.55271e-15
TAL1BETAE47	744	KIFC2, MEF2C, PLEKHM3, PGF, TUBB2A, SCN3B, RUSC2, HOXD12, FSTL4, HOXD13, FRRS1L, HOXD11, HTR1A, GRIN2B, GRIN2C, WDR76, FSTL5, CDCA2, LRRC7, TMEFF2, NCF4, TTC7B, SCN2A, KIF5C, GRIN2A, PTPRR, OLFML2A, ESPL1, PTPRT, PTPRN, BCL2L12, PCLO, TMEM132D, PDCD1LG2, CTNNA3, ADAMTS6, ADAMTS9, SSTR3, PITPNM3, EGFLAM, ADAMTS8, ARFGEF3, HNF4A, SSTR1, BHLHA9, ST14, CD164L2, SMPX, RYR2, TGIF2, RPS10, ST18, FAM163B…	6.4856e-15	1.27676e-14
HOX13	1109	PDP1, MEF2C, GRIN3A, B2M, GRIN2B, GRIN2C, MAP3K9, RPLP0, C17ORF96, SH3GL3, TMEFF2, SCN2B, KIF5A, BARHL1, PTBP1, KIF5C, SCN2A, BSN, ESPL1, BTBD9, LPCAT4, SSTR2, DOC2A, ARFGEF3, RYR2, CMIP, UNC13C, SH3GL2, UNC13A, KIF4A, DNAH17, ARHGEF28, CACNB1, CACNB3, FAM19A1, FAM19A4, MYBL2, SERPINH1, C1ORF54, CASZ1, CCSER1, SGIP1, ARHGEF33, ARHGEF39, MYADML2, KIF3C, EIF4E1B, UQCRHL, PARP9, RGS7, PLCXD2, ZNF536…	7.63654e-15	1.4988e-14
FREAC2	821	MEF2C, OSMR, SCN3B, GRIN3A, GRIN2B, RPLP0, SERPINE1, LRRC7, TMEFF2, KIF5A, SCN2A, KIF5C, GRIN2A, ESPL1, F7, BTBD9, SSTR3, EGFLAM, ARFGEF3, RYR2, MAPK9, CMIP, UNC13C, KIAA1107, KIF4A, DNAH17, CACNB2, CACNB3, FAM19A2, CACNB4, FAM19A1, MYBL2, FAM19A4, RAC2, UPK1B, CASZ1, CCSER1, ARHGEF33, SERPINI1, GAS7, BTBD16, RGS1, AKNAD1, RGS7, MAB21L3, PLCXD2, OPRM1, ZNF536, FGF9, NUAK1, GRIP1, DPP10, YBX3, PCP…	8.84198e-15	1.72085e-14
SRF	1671	MEF2C, GDA, SCN3B, DIRAS2, MAP3K9, RPLP0, VNN1, RAB27B, LRRC7, RAB27A, TMEFF2, CYP1A1, SCN2B, BARHL1, SCN2A, BSN, BTBD9, DOC2A, EGFLAM, NCR3LG1, ARHGEF28, CACNB1, CACNB2, FAM19A2, CACNB3, FAM19A1, CACNB4, RCC1, FAM19A4, CKLF, CCSER1, ARHGEF33, CYP46A1, ARHGEF39, CAMK2N1, EIF4E1B, DUSP26, RGS4, RGS7, NUAK1, GRIP1, EZH2, YBX3, LRRC17, YBX1, IL1RAP, IGFLR1, AIFM3, MMP17, MMP14, MYRIP, FANCD2, GRIP2,…	9.3819e-15	1.80966e-14
STAT5B	832	PDP1, MEF2C, GRIN3A, GRIN2B, VNN2, LRRC7, RAB27A, SH3GL3, TMEFF2, SCN2A, GRIN2A, BSN, TMEM130, BTBD9, EGFLAM, ARFGEF3, SSTR1, RYR2, UNC13C, SH3GL2, KIAA1107, PLCXD3, KIF4A, ARHGEF28, CACNB2, FAM19A2, CACNB4, FAM19A1, FAM19A4, CASZ1, CCSER1, SGIP1, ARHGEF33, NDC80, SERPINI1, EMILIN2, GAS7, UQCRHL, BTBD16, AKNAD1, RGS7, PLCXD2, OPRM1, ZNF536, NUAK1, KCNAB1, DPP10, YBX3, NBEA, YBX1, SRPX, SNPH, IL1R…	9.6717e-15	1.83187e-14
CEBPA	732	PDP1, MEF2C, PLEKHM3, XRCC2, SLC9A6, TUBB2A, HOXD12, FSTL4, HOXD13, L1CAM, FSTL1, GRIN3A, HOXD10, HOXD11, CDH22, TMEM144, GRIN2B, RPLP0, FSTL5, CDCA2, GNG3, VNN2, C17ORF96, NWD2, TMEFF2, TTC7B, SCN2A, GRIN2A, PTPRT, HNF4G, BCL2L12, PCLO, BTBD9, LPCAT4, TMEM132D, CTNNA3, ADAMTS6, SSTR2, NPC2, DOC2A, EGFLAM, ARFGEF3, MAPK9, SMPX, RYR2, TGIF1, CMIP, ST18, SH3GL2, KIF4A, ERBB4, GNAI1, SORCS1, FAM19A2…	1.04797e-14	1.95399e-14
ATF6	1120	MEF2C, SCN3B, CRHBP, GRIN3A, GRIN2C, MAP3K9, RPLP0, SERPINE1, RAB27A, C17ORF96, INA, SH3GL3, TMEFF2, KIF5A, BARHL1, PTBP1, KIF5C, SCN2A, GRIN2A, OLFML2A, BSN, ESPL1, BTBD9, LPCAT4, SSTR4, DOC2A, NPC2, SSTR3, ARFGEF3, RYR2, MAPK9, CMIP, NCR3LG1, KIF4A, DNAH17, CACNB1, CACNB2, BCL2L2, CACNB3, FAM19A1, CACNB4, FAM19A4, SERPINH1, VWA5B2, UPK1B, CASZ1, CCSER1, LFNG, SGIP1, ARHGEF33, KIF3A, MOBP, MYADM…	1.31054e-14	2.43139e-14
FOXO1	1016	MEF2C, GRIN3A, GRIN2B, GRIN2C, MAP3K9, RPLP0, RAB27B, LRRC7, TMEFF2, BARHL1, SCN2A, KIF5C, GRIN2A, BSN, BTBD9, DOC2A, NPC2, EGFLAM, ARFGEF3, SSTR1, RYR2, MAPK9, CMIP, UNC13C, NCR3LG1, KIF4A, PLCXD3, DNAH17, ARHGEF28, CACNB1, CACNB2, FAM19A2, FAM19A1, CACNB4, FAM19A4, MYBL2, C1ORF54, TMEM125, CASZ1, CCSER1, SGIP1, MOBP, NDC80, SERPINI1, GAS7, EIF4E1B, BTBD16, RGS1, PARP9, RGS4, AKNAD1, RGS7, MAB21…	1.4755e-14	2.70894e-14
AHR	843	GRIN3A, B2M, GRIN2B, GRIN2C, LRRC7, C17ORF96, TMEFF2, CYP1A1, KIF5A, BARHL1, GRIN2A, OLFML2A, BSN, ESPL1, SSTR4, SSTR2, NPC2, SSTR3, EGFLAM, RYR2, MAPK9, CMIP, UNC13A, CACNB3, BCL2L2, CASZ1, CCSER1, LFNG, PPP2R2C, KIF3A, CYP46A1, EMILIN2, GAS7, KIF3C, CAMK2N1, EIF4E1B, RGS7, PLCXD2, KCNAB2, KCNAB1, ST6GALNAC5, SNPH, CEACAM5, AR, HYAL2, SH3PXD2A, AIFM3, CACNG8, ARHGEF19, SLC22A8, PI4KA, CACNG3, CA…	1.50215e-14	2.72005e-14
ARP1	1155	MEF2C, GRIN3A, CDH22, GRIN2B, MAP3K9, VNN1, LRRC7, C17ORF96, INA, SH3GL3, TMEFF2, KIF5A, BARHL1, GRIN2A, BSN, OLFML2A, ESPL1, EXD1, BTBD9, LPCAT4, SSTR2, EGFLAM, DOC2A, NPC2, SSTR1, RYR2, CMIP, SH3GL2, KIF4A, PLCXD3, ARHGEF28, DNAH17, CACNB1, CACNB2, CACNB3, FAM19A2, FAM19A1, CACNB4, FAM19A4, C1ORF54, TMEM125, CASZ1, PABPC3, POTEG, POTEF, PPP2R2C, POTEE, ARHGEF33, KIF3A, ARHGEF39, MYADML2, EMILIN…	1.59522e-14	2.87548e-14
ISRE	1073	MEF2C, GDA, SCN3B, GRIN3A, B2M, CDH22, DIRAS2, GRIN2B, RPLP0, SERPINE1, VNN1, LRRC7, RAB27A, C17ORF96, SH3GL3, TMEFF2, CYP1A1, SCN2B, KIF5A, KIF5C, SCN2A, GRIN2A, OLFML2A, BSN, ESPL1, SERPING1, TMEM130, BTBD9, NPC2, EGFLAM, ARFGEF3, RYR2, MAPK9, CMIP, UNC13C, SH3GL2, UNC13A, HLA-DRA, KIAA1107, NCR3LG1, KIF4A, DNAH17, ARHGEF28, CACNB3, FAM19A2, FAM19A1, CACNB4, FAM19A4, RCC1, C1ORF54, RAC2, VWA5B2…	1.67411e-14	2.9865e-14
AP2REP	1088	MEF2C, CRHBP, GRIN3A, CDH22, TMEM144, GRIN2B, GRIN2C, RPLP0, SERPINE1, LRRC7, RAB27A, TMEFF2, KIF5A, BARHL1, KIF5C, SCN2A, GRIN2A, BSN, ESPL1, F7, BTBD9, LPCAT4, SSTR4, SSTR2, NPC2, ARFGEF3, RYR2, MAPK9, CMIP, UNC13C, SH3GL2, UNC13A, KIF4A, PLCXD3, DNAH17, ARHGEF28, CACNB1, CACNB2, BCL2L2, CACNB3, FAM19A1, CACNB4, FAM19A4, C1ORF54, VWA5B2, CASZ1, CCSER1, LFNG, PPP2R2C, SGIP1, KIF3A, ARHGEF39, MYA…	2.29266e-14	4.05231e-14
GATA3	611	KIFC2, MEF2C, KIFC1, PLEKHM3, PTGS1, HOXD12, FSTL4, HOXD13, HOXD10, HOXD11, SYP, GRIN2B, RPLP0, FSTL5, GNG3, CDCA3, NWD2, TMEFF2, SCN2B, TTC7B, GRIN2A, BSN, PTPRT, PCLO, BCL2L12, BTBD9, PDCD1LG2, CTNNA3, SSTR4, ADAMTS7, SSTR3, ADAMTS8, ARFGEF3, HNF4A, BHLHA9, CD164L2, RYR2, RPS10, ST18, UNC13A, ERBB4, CACNB1, SORCS1, FAM19A2, CACNB3, FAM19A1, MYBL2, SORCS2, TP53TG5, SORCS3, KIAA1549L, P3H2, C1ORF…	2.32389e-14	4.05231e-14
NKX22	1082	PDP1, MEF2C, GDA, OSMR, GRIN3A, CDH22, TMEM144, GRIN2B, RAB27B, LRRC7, VNN2, TMEFF2, SCN2B, KIF5A, PDPN, BARHL1, GRIN2A, BSN, BTBD9, NPC2, EGFLAM, RYR2, MAPK9, UNC13C, KIF4A, PLCXD3, DNAH17, ARHGEF28, CACNB2, FAM19A2, FAM19A1, CACNB4, FAM19A4, C1ORF54, CKLF, CASZ1, CCSER1, POTEG, POTEF, POTEE, SGIP1, KIF3A, MOBP, EMILIN2, SERPINI1, GAS7, CAMK2N1, BTBD16, PARP9, RGS4, RGS7, MAB21L3, PLCXD2, OPRM1,…	3.03563e-14	5.24025e-14
CEBPB	1331	MEF2C, GDA, GRIN3A, CDH22, DIRAS2, GRIN2B, MAP3K9, RPLP0, SERPINE1, VNN1, LRRC7, RAB27A, TMEFF2, CYP1A1, SCN2B, KIF5A, BARHL1, KIF5C, SCN2A, GRIN2A, BSN, OLFML2A, ESPL1, SERPING1, F7, EXD1, BTBD9, SSTR4, EGFLAM, NPC2, ARFGEF3, SSTR1, MAPK9, RYR2, CMIP, UNC13C, SH3GL2, NCR3LG1, KIF4A, PLCXD3, ARHGEF28, DNAH17, CACNB1, CACNB2, BCL2L2, CACNB3, FAM19A2, FAM19A1, CACNB4, FAM19A4, MYBL2, C1ORF54, CASZ1…	3.09947e-14	5.30687e-14
TST1	1068	PDP1, MEF2C, OSMR, GRIN3A, CDH22, GRIN2B, GRIN2C, MAP3K9, LRRC7, VNN2, RAB27A, INA, TMEFF2, SCN2B, PDPN, BARHL1, KIF5C, SCN2A, GRIN2A, OLFML2A, BSN, ESPL1, TMEM130, BTBD9, LPCAT4, SSTR2, DOC2A, EGFLAM, RYR2, MAPK9, CMIP, UNC13C, KIF4A, PLCXD3, DNAH17, CACNB2, BCL2L2, FAM19A2, FAM19A1, CACNB4, MYBL2, CKLF, CASZ1, CCSER1, SGIP1, ARHGEF33, MOBP, ARHGEF39, NDC80, KIF3C, SEPT12, RGS7, PLCXD2, ZNF536, …	3.39206e-14	5.76206e-14
CP2	971	MEF2C, SCN3B, GRIN3A, CDH22, GRIN2C, VNN2, TMEFF2, SCN2B, PDPN, KIF5A, NODAL, PTBP1, SCN2A, GRIN2A, OLFML2A, BSN, ESPL1, EXD1, BTBD9, LPCAT4, SSTR2, DOC2A, NPC2, SSTR3, EGFLAM, RYR2, UNC13A, KIF4A, DNAH17, ARHGEF28, CACNB1, CACNB3, BCL2L2, FAM19A2, FAM19A1, CACNB4, FAM19A4, SERPINH1, SULT4A1, VWA5B2, CASZ1, LFNG, SGIP1, CYP46A1, ARHGEF39, MYADML2, EMILIN2, GAS7, KIF3C, CAMK2N1, EIF4E1B, UQCRHL, P…	3.41719e-14	5.73985e-14
IK2	759	PDP1, MEF2C, GDA, SLC9A6, MASP1, STRC, PLPPR4, FSTL4, KCNK9, GRIN2B, PPP1R1A, FSTL5, GNG3, GNG5, CDCA3, C17ORF96, SH3GL3, NWD2, TMEFF2, WNT10B, NCF2, CLCA4, NCF4, CDHR1, TTC7B, CDHR2, SCN2A, KIF5C, GRIN2A, OLFML2A, PTPRT, PCLO, TMEM132D, CTNNA3, NME4, ADAMTS7, SSTR2, NPC2, EGFLAM, MAPK9, RYR2, ST18, UNC13A, IL1R2, KIF4A, ERBB4, DNAH17, PCDH20, ARHGEF28, CACNB1, SORCS1, HFE, FAM19A2, CACNB3, BCL2L…	4.05293e-14	6.73905e-14
LUN1	1197	MEF2C, OSMR, GRIN3A, CDH22, TMEM144, GRIN2B, GRIN2C, MAP3K9, RPLP0, SERPINE1, LRRC7, SCN2B, KIF5C, GRIN2A, BSN, OLFML2A, ESPL1, F7, BTBD9, LPCAT4, EGFLAM, NPC2, SSTR1, RYR2, MAPK9, CMIP, UNC13C, KIF4A, DNAH17, CACNB1, BCL2L2, CACNB3, FAM19A2, FAM19A1, CACNB4, MYBL2, C1ORF54, VWA5B2, UPK1B, CASZ1, CCSER1, LFNG, PPP2R2C, SGIP1, ARHGEF39, MOBP, NDC80, KIF3C, GAS7, UQCRHL, SEPT12, BTBD16, HPCA, RGS7,…	4.26974e-14	7.04992e-14
HSF1	764	MEF2C, KIFC1, PLEKHM3, SLC9A6, RP2, STRC, SLC9A2, HOXD12, FSTL4, HOXD13, GRIN3A, KCNK9, GRIN2B, GRIN2C, WDR76, FSTL5, LRRC7, NWD2, TMEFF2, KIF5A, CDHR1, BARHL1, TTC7B, SCN2A, KIF5C, GRIN2A, PTPRR, BSN, ESPL1, PTPRT, TMEM130, BTBD9, TMEM132D, CTNNA3, PDCD1LG2, ADAMTS7, SSTR2, ADAMTS9, RPS18, NPC2, PITPNM3, EGFLAM, ST14, RYR2, TGIF1, ST18, UNC13C, SH3GL2, IL1R2, MGAT5B, DBNDD2, SERPINA10, ERBB4, DN…	7.09142e-14	1.15907e-13
MSX1	1017	PDP1, MEF2C, SCN3B, GRIN3A, CDH22, GRIN2B, LRRC7, INA, SH3GL3, TMEFF2, SCN2B, KIF5A, KIF5C, SCN2A, GRIN2A, OLFML2A, SERPING1, F7, EXD1, TMEM130, BTBD9, NPC2, RYR2, MAPK9, CMIP, UNC13C, SH3GL2, UNC13A, NCR3LG1, KIF4A, DNAH17, ARHGEF28, CACNB1, CACNB2, CACNB3, FAM19A2, FAM19A1, CACNB4, FAM19A4, C1ORF54, CASZ1, PABPC3, CCSER1, SGIP1, ARHGEF33, KIF3A, MYADML2, NDC80, KIF3C, GAS7, RGS4, AKNAD1, RGS7, …	9.75902e-14	1.57874e-13
E4BP4	1059	PDP1, MEF2C, OSMR, GRIN3A, CDH22, GRIN2B, LRRC7, C17ORF96, SH3GL3, TMEFF2, BARHL1, PTBP1, KIF5C, SCN2A, GRIN2A, OLFML2A, BSN, BTBD9, LPCAT4, SSTR2, EGFLAM, ARFGEF3, RYR2, CMIP, UNC13C, SH3GL2, KIAA1107, KIF4A, ARHGEF28, CACNB2, BCL2L2, FAM19A2, FAM19A1, CACNB4, FAM19A4, C1ORF54, SULT4A1, CASZ1, PABPC3, CCSER1, POTEG, POTEF, POTEE, SGIP1, ARHGEF33, KIF3A, NDC80, SERPINI1, KIF3C, GAS7, RGS1, RGS4, …	9.9839e-14	1.60094e-13
CEBP	1796	MEF2C, GDA, SCN3B, OSMR, B2M, RPLP0, RAB27B, LRRC7, TMEFF2, BARHL1, SCN2A, BSN, BTBD9, DOC2A, EGFLAM, TFPI, NCR3LG1, ARHGEF28, DNAH17, CACNB1, CACNB2, FAM19A2, CACNB3, CACNB4, FAM19A1, RCC1, FAM19A4, MYBL2, CKLF, CCSER1, ARHGEF33, ARHGEF39, CYP46A1, NDC80, GAS7, CAMK2N1, RGS1, PARP9, HPCA, RGS7, GRIP1, NUAK1, EZH2, PCP4L1, YBX3, LRRC17, MMP25, GTSE1, IL1RAP, IGFLR1, SLC22A6, GAPT, CACNG8, SLC22A8…	1.10063e-13	1.7486e-13
IK1	876	GRIN3A, CDH22, GRIN2B, RPLP0, MAP3K9, VNN1, VNN2, LRRC7, RAB27A, TMEFF2, KIF5A, BARHL1, NODAL, GRIN2A, BSN, ESPL1, BTBD9, SSTR4, ARFGEF3, RYR2, CMIP, UNC13C, SH3GL2, KIF4A, DNAH17, CACNB2, BCL2L2, FAM19A2, CACNB4, FAM19A1, SERPINH1, RAC2, UPK1B, CASZ1, CCSER1, SGIP1, ARHGEF39, EMILIN2, GAS7, KIF3C, EIF4E1B, RGS7, MAB21L3, PLCXD2, ZNF536, ELF4, FGF9, KCNAB1, DPP10, YBX3, LRRC17, SNPH, GFOD1, AR, S…	1.11205e-13	1.75193e-13
GATA6	450	PLEKHM3, MASP1, SLC9A2, FSTL4, FRRS1L, B2M, CDH22, GRIN2B, WDR76, PPP1R1A, RAB27B, LRRC7, SH3GL3, TMEFF2, NWD2, KIF5A, CDHR1, SCN2A, TTC7B, GRIN2A, PTPRR, PTPRT, HNF4G, PCLO, CTNNA3, ADAMTS6, PITPNM3, HNF4A, RYR2, RPS10, TGIF2, ST18, UNC13C, KIF4A, ERBB4, GNAI1, ARHGEF28, SORCS1, CACNB2, FAM19A1, FAM19A4, KCNJ3, CTIF, SORCS3, KCNJ1, HCRTR2, RAC2, PPP1R3F, CASZ1, CCSER1, LFNG, ODC1, EME1, GAS7, RP…	1.14281e-13	1.78413e-13
GATA1	1892	MEF2C, GDA, SCN3B, OSMR, B2M, DIRAS2, MAP3K9, RPLP0, RAB27B, LRRC7, VNN2, RAB27A, TMEFF2, SCN2B, BARHL1, PTBP1, SCN2A, BSN, BTBD9, EGFLAM, DOC2A, TFPI, NCR3LG1, ARHGEF28, DNAH17, CACNB1, CACNB2, FAM19A2, CACNB3, CACNB4, FAM19A1, FAM19A4, MYBL2, CCSER1, ARHGEF33, ARHGEF39, CYP46A1, GAS7, RGS1, PARP9, RGS7, GRIP1, NUAK1, EZH2, PCP4L1, YBX3, LRRC17, YBX1, IL1RAP, IGFLR1, SLC22A6, GAPT, AIFM3, SLC22A…	1.23322e-13	1.90958e-13
HLF	989	PDP1, MEF2C, OSMR, GRIN3A, CDH22, GRIN2B, SERPINE1, LRRC7, VNN2, C17ORF96, SH3GL3, TMEFF2, SCN2B, KIF5A, BARHL1, SCN2A, KIF5C, GRIN2A, BSN, BTBD9, SSTR4, NPC2, EGFLAM, ARFGEF3, SSTR1, RYR2, MAPK9, CMIP, UNC13C, SH3GL2, KIAA1107, KIF4A, PLCXD3, DNAH17, ARHGEF28, CACNB2, BCL2L2, FAM19A2, FAM19A1, CACNB4, FAM19A4, C1ORF54, CASZ1, CCSER1, LFNG, PPP2R2C, SGIP1, ARHGEF33, KIF3A, MOBP, SERPINI1, EMILIN2…	1.35238e-13	2.07501e-13
NCX	1085	MEF2C, GDA, OSMR, GRIN3A, CDH22, GRIN2B, MAP3K9, RPLP0, SERPINE1, RAB27B, LRRC7, SH3GL3, TMEFF2, BARHL1, NODAL, PTBP1, KIF5C, SCN2A, GRIN2A, OLFML2A, BSN, ESPL1, TMEM130, BTBD9, LPCAT4, SSTR4, DOC2A, NPC2, SSTR3, EGFLAM, ARFGEF3, RYR2, MAPK9, CMIP, UNC13C, SH3GL2, PLCXD3, DNAH17, ARHGEF28, CACNB1, FAM19A2, FAM19A1, CACNB4, FAM19A4, C1ORF54, RAC2, VWA5B2, TMEM125, CKLF, UPK1B, CASZ1, CCSER1, POTEG…	2.07328e-13	3.15303e-13
ARNT	1153	CDH22, DIRAS2, GRIN2B, GRIN2C, MAP3K9, RPLP0, SERPINE1, RAB27B, C17ORF96, SH3GL3, TMEFF2, CYP1A1, KIF5A, BARHL1, PTBP1, GRIN2A, BSN, OLFML2A, ESPL1, F7, LPCAT4, SSTR2, SSTR3, ARFGEF3, SSTR1, MAPK9, CMIP, UNC13A, HLA-DRA, KIF4A, DNAH17, CACNB1, CACNB3, FAM19A2, FAM19A4, MYBL2, SERPINH1, C1ORF54, VWA5B2, TMEM125, UPK1B, CASZ1, CCSER1, PPP2R2C, SGIP1, ARHGEF33, KIF3A, ARHGEF39, MYADML2, EMILIN2, KIF…	2.30706e-13	3.48055e-13
TCF11MAFG	1254	PDP1, MEF2C, GRIN3A, CDH22, GRIN2B, MAP3K9, SERPINE1, VNN1, LRRC7, SH3GL3, TMEFF2, CYP1A1, KIF5A, PTBP1, KIF5C, SCN2A, GRIN2A, BSN, OLFML2A, F7, BTBD9, SSTR4, EGFLAM, DOC2A, NPC2, ARFGEF3, RYR2, CMIP, UNC13C, SH3GL2, HLA-DRA, PLCXD3, ARHGEF28, CACNB2, FAM19A1, CACNB4, FAM19A4, C1ORF54, VWA5B2, UPK1B, CASZ1, CCSER1, LFNG, POTEF, SGIP1, ARHGEF39, CYP46A1, NDC80, EMILIN2, SERPINI1, KIF3C, GAS7, UQCR…	2.4705e-13	3.69482e-13
HFH1	1081	MEF2C, GDA, OSMR, GRIN2B, SERPINE1, VNN1, RAB27B, LRRC7, INA, SH3GL3, TMEFF2, SCN2B, KIF5A, PDPN, BARHL1, PTBP1, KIF5C, SCN2A, GRIN2A, BSN, ESPL1, F7, TMEM130, BTBD9, NPC2, EGFLAM, ARFGEF3, RYR2, MAPK9, CMIP, UNC13C, KIAA1107, KIF4A, PLCXD3, DNAH17, ARHGEF28, CACNB1, CACNB2, BCL2L2, FAM19A2, FAM19A1, CACNB4, FAM19A4, MYBL2, CASZ1, PABPC3, CCSER1, SGIP1, CYP46A1, MYADML2, SERPINI1, GAS7, CAMK2N1, …	2.62381e-13	3.89133e-13
ZIC2	610	PDP1, MEF2C, PGF, TUBB2A, SCN3B, STRC, FSTL4, L1CAM, GRIN3A, FRRS1L, GRIN2B, VNN1, GNG3, C17ORF96, NWD2, TMEFF2, WNT10B, NCF1, TTC7B, GRIN2A, BSN, PTPRT, BCL2L12, TMEM132D, PITPNM3, HNF4A, CMIP, TM6SF2, KIF4A, RTP5, DNAH17, BCL2L2, CACNB4, FAM19A4, SERPINH1, SORCS2, CTIF, SORCS3, HCRTR2, P3H1, C1ORF54, PPP1R3B, CASZ1, TUBB4A, IQSEC2, SGIP1, ARHGEF33, MOBP, NDUFA4L2, CCDC80, MYADML2, NDC80, GAS7, …	3.08462e-13	4.53748e-13
MEF2	1735	MEF2C, GDA, SCN3B, OSMR, B2M, MAP3K9, RPLP0, VNN1, RAB27B, LRRC7, VNN2, RAB27A, TMEFF2, SCN2B, BARHL1, PTBP1, SCN2A, BSN, BTBD9, EGFLAM, TFPI, NCR3LG1, ARHGEF28, CACNB1, CACNB2, FAM19A2, CACNB3, CACNB4, FAM19A1, FAM19A4, MYBL2, UPK1B, CCSER1, ARHGEF33, CYP46A1, NDC80, GAS7, CAMK2N1, EIF4E1B, RGS1, DUSP26, RGS4, RGS7, GRIP1, NUAK1, EZH2, PCP4L1, YBX3, LRRC17, GTSE1, YBX1, IL1RAP, SLC22A6, SLC22A2,…	3.37342e-13	4.92273e-13
MAX	465	KIFC2, KIFC1, HOXD10, HOXD11, CDH22, GRIN2C, PPP1R1B, CDCA2, WNT10B, BARHL1, SCN2A, GRIN2A, BSN, PTPRT, TMEM130, LPCAT4, SSTR2, RPS18, PITPNM3, ARFGEF3, CD164L2, RYR2, MAPK9, CMIP, TGIF2, ST18, TM6SF2, HLA-DRA, PLCXD3, SORCS1, CCDC167, FAM19A1, CTIF, SORCS2, SORCS3, C1ORF54, PPP1R3B, IQSEC3, LFNG, PLTP, IQSEC1, SPIN2A, SGIP1, NDUFA4L2, EME1, RPS5, GAS7, NPY5R, KCNK3, KCNK4, HSPA12A, DUSP26, MAP7,…	3.6989e-13	5.3535e-13
NFKAPPAB65	572	KIFC1, FSTL4, GRIN3A, HOXD10, HOXD11, ADTRP, HTR1A, GRIN2B, PPP1R1B, RPLP0, CDCA2, GNG3, CDCA3, C17ORF96, NWD2, NCF2, SCN2B, NCF4, TTC7B, GRIN2A, OLFML2A, PTPRT, EXD1, BCL2L12, ADAMTS7, PITPNM3, EGFLAM, ST14, PLCXD3, ERBB4, DNAH17, SORCS1, CACNB2, CACNB4, FAM19A1, SERPINH1, TP53TG5, SORCS3, KIAA1549L, KCNJ1, P3H1, MYO15A, PPP1R3F, CASZ1, PABPC3, CCSER1, IQSEC1, IQSEC2, TCF7, MKI67, NDUFA4L2, NUF2…	3.70546e-13	5.32019e-13
CDPCR3HD	1086	PDP1, MEF2C, GDA, OSMR, GRIN3A, CDH22, DIRAS2, GRIN2B, GRIN2C, MAP3K9, RPLP0, VNN2, RAB27A, TMEFF2, BARHL1, KIF5C, SCN2A, GRIN2A, OLFML2A, ESPL1, BTBD9, LPCAT4, DOC2A, SSTR3, EGFLAM, RYR2, UNC13C, SH3GL2, PLCXD3, DNAH17, CACNB1, BCL2L2, CACNB3, FAM19A2, FAM19A1, CACNB4, FAM19A4, C1ORF54, VWA5B2, CASZ1, PABPC3, CCSER1, POTEG, POTEF, POTEE, SGIP1, MOBP, CYP46A1, MYADML2, EMILIN2, SERPINI1, KIF3C, G…	3.77183e-13	5.37015e-13
HTF	1282	MEF2C, SCN3B, CRHBP, GRIN3A, CDH22, DIRAS2, GRIN2B, GRIN2C, RPLP0, VNN1, RAB27B, RAB27A, SH3GL3, TMEFF2, CYP1A1, SCN2B, BARHL1, PTBP1, KIF5C, SCN2A, GRIN2A, BSN, OLFML2A, ESPL1, TMEM130, HLA-DQA2, BTBD9, HLA-DQA1, LPCAT4, SSTR4, EGFLAM, DOC2A, NPC2, ARFGEF3, RYR2, MAPK9, CMIP, UNC13C, UNC13A, NCR3LG1, ARHGEF28, DNAH17, CACNB1, CACNB2, BCL2L2, CACNB3, FAM19A2, FAM19A1, CACNB4, RCC1, VWA5B2, UPK1B,…	4.32637e-13	6.11178e-13
AML1	1804	MEF2C, OSMR, B2M, MAP3K9, RPLP0, VNN1, RAB27B, LRRC7, VNN2, TMEFF2, SCN2B, PTBP1, SCN2A, BSN, BTBD9, DOC2A, EGFLAM, HLA-DRA, ARHGEF28, DNAH17, CACNB1, CACNB2, FAM19A2, CACNB3, CACNB4, FAM19A1, FAM19A4, MYBL2, UPK1B, CCSER1, HLA-DOA, LFNG, ARHGEF33, ARHGEF39, CYP46A1, NDC80, GAS7, CAMK2N1, EIF4E1B, RGS1, PARP9, RGS7, GRIP1, NUAK1, EZH2, PCP4L1, YBX3, LRRC17, SCIMP, GTSE1, YBX1, IL1RAP, IGFLR1, SLC…	4.56361e-13	6.39711e-13
GR	1246	PDP1, MEF2C, GDA, OSMR, CRHBP, CDH22, GRIN2B, MAP3K9, RPLP0, SERPINE1, RAB27B, LRRC7, C17ORF96, INA, TMEFF2, BARHL1, KIF5C, SCN2A, GRIN2A, BSN, OLFML2A, BTBD9, LPCAT4, DOC2A, NPC2, SSTR3, ARFGEF3, RYR2, MAPK9, CMIP, UNC13C, UNC13A, KIAA1107, KIF4A, DNAH17, BCL2L2, FAM19A2, FAM19A1, CACNB4, FAM19A4, MYBL2, SERPINH1, C1ORF54, VWA5B2, TMEM125, UPK1B, CASZ1, CCSER1, LFNG, PPP2R2C, POTEF, ARHGEF39, MO…	4.97798e-13	6.92335e-13
NFAT	1009	MEF2C, SCN3B, CRHBP, GRIN3A, GRIN2B, RPLP0, RAB27B, LRRC7, TMEFF2, KIF5A, NODAL, SCN2A, KIF5C, GRIN2A, BSN, TMEM130, BTBD9, NPC2, EGFLAM, ARFGEF3, SSTR1, RYR2, CMIP, UNC13C, SH3GL2, KIF4A, PLCXD3, DNAH17, ARHGEF28, CACNB2, FAM19A2, FAM19A1, CACNB4, FAM19A4, SERPINH1, UPK1B, CASZ1, PABPC3, CCSER1, HLA-DOA, POTEF, PPP2R2C, SGIP1, ARHGEF33, KIF3A, MYADML2, NDC80, GAS7, KIF3C, UQCRHL, BTBD16, RGS1, P…	8.6898e-13	1.19904e-12
FOXO4	1293	PDP1, MEF2C, GDA, SCN3B, OSMR, GRIN3A, GRIN2B, MAP3K9, RPLP0, VNN1, RAB27B, LRRC7, TMEFF2, KIF5A, BARHL1, NODAL, KIF5C, SCN2A, GRIN2A, BSN, OLFML2A, ESPL1, TMEM130, BTBD9, LPCAT4, EGFLAM, DOC2A, NPC2, ARFGEF3, SSTR1, RYR2, MAPK9, CMIP, UNC13C, SH3GL2, KIF4A, PLCXD3, ARHGEF28, DNAH17, CACNB1, CACNB2, CACNB3, FAM19A2, FAM19A1, CACNB4, FAM19A4, MYBL2, SERPINH1, C1ORF54, RAC2, TMEM125, UPK1B, CASZ1, …	9.47418e-13	1.2973e-12
IRF2	1002	PDP1, MEF2C, GDA, CRHBP, GRIN3A, B2M, CDH22, TMEM144, MAP3K9, RPLP0, VNN1, LRRC7, RAB27A, TMEFF2, CYP1A1, SCN2B, PTBP1, SCN2A, KIF5C, GRIN2A, SERPING1, BTBD9, LPCAT4, EGFLAM, ARFGEF3, RYR2, MAPK9, CMIP, UNC13C, SH3GL2, HLA-DRA, PLCXD3, ARHGEF28, CACNB2, FAM19A2, FAM19A1, CACNB4, FAM19A4, RCC1, C1ORF54, UPK1B, CASZ1, CCSER1, SGIP1, ARHGEF33, KIF3A, ARHGEF39, NDC80, EMILIN2, GAS7, UQCRHL, BTBD16, R…	1.21521e-12	1.65123e-12
HNF4	1152	MEF2C, GDA, SCN3B, OSMR, GRIN3A, GRIN2B, GRIN2C, RAB27A, C17ORF96, TMEFF2, CYP1A1, KIF5A, BARHL1, SCN2A, BSN, OLFML2A, ESPL1, SERPING1, HLA-DQA2, BTBD9, EGFLAM, DOC2A, SSTR3, ARFGEF3, SSTR1, RYR2, MAPK9, CMIP, UNC13C, UNC13A, KIF4A, ARHGEF28, CACNB1, BCL2L2, CACNB3, FAM19A2, FAM19A1, SERPINH1, C1ORF54, RAC2, VWA5B2, TMEM125, CASZ1, HLA-DOA, LFNG, PPP2R2C, SGIP1, ARHGEF33, ARHGEF39, MYADML2, NDC80…	1.38403e-12	1.86628e-12
EGR2	259	SYT2, NELL1, SYT9, ACBD7, TMEM151B, TMEM151A, FAM124A, CDH22, HOOK1, SYP, BDNF, BRINP1, GOT1, KCNK9, PPP1R1B, PPP1R1A, PRRT1, ADGRB3, LRRC7, S100A2, SCN2B, GRIN2A, HTR4, PTPRT, TMEM150B, ADAMTS6, UHRF1, ADAMTS9, NPC2, MAD2L1, SSTR1, ASPHD1, RAB15, TGIF2, ST18, LAMC1, TGFB1I1, MYH7B, KIF4A, TDRD5, ERBB4, TDRD9, CACNB1, CACNB3, RIMS1, OTP, SORCS3, CASZ1, LFNG, IQSEC1, TYROBP, GPR158, AGBL1, NDUFA4L…	1.66401e-12	2.227e-12
POU6F1	1024	PDP1, MEF2C, GDA, GRIN3A, CDH22, GRIN2B, GRIN2C, RPLP0, VNN1, RAB27B, LRRC7, INA, SH3GL3, TMEFF2, BARHL1, NODAL, KIF5C, SCN2A, GRIN2A, OLFML2A, BTBD9, EGFLAM, ARFGEF3, SSTR1, TFPI, RYR2, UNC13C, SH3GL2, KIF4A, PLCXD3, ARHGEF28, CACNB2, FAM19A2, FAM19A1, CACNB4, FAM19A4, CASZ1, CCSER1, PPP2R2C, SGIP1, ARHGEF33, KIF3A, NDC80, SERPINI1, GAS7, RGS7, PLCXD2, OPRM1, ZNF536, KCNAB2, ELF4, KCNAB1, GRIP1,…	1.87927e-12	2.49634e-12
CREB	1039	MEF2C, OSMR, GRIN3A, GRIN2B, GRIN2C, MAP3K9, RPLP0, RAB27B, LRRC7, C17ORF96, SH3GL3, SCN2B, KIF5A, BARHL1, PTBP1, KIF5C, GRIN2A, OLFML2A, BSN, ESPL1, BTBD9, SSTR2, DOC2A, SSTR3, ARFGEF3, SSTR1, RYR2, MAPK9, CMIP, UNC13C, SH3GL2, UNC13A, NCR3LG1, KIF4A, PLCXD3, DNAH17, CACNB1, CACNB2, FAM19A1, MYBL2, SULT4A1, VWA5B2, TMEM125, CASZ1, CCSER1, LFNG, PPP2R2C, SGIP1, MYADML2, NDC80, KIF3C, CAMK2N1, OPR…	2.07684e-12	2.73848e-12
PAX6	1287	MEF2C, GDA, CRHBP, CDH22, GRIN2B, MAP3K9, RPLP0, SERPINE1, VNN1, RAB27B, LRRC7, TMEFF2, NODAL, KIF5C, SCN2A, GRIN2A, BSN, ESPL1, TMEM130, LPCAT4, SSTR2, EGFLAM, DOC2A, SSTR3, RYR2, CMIP, UNC13C, UNC13A, SH3GL2, KIF4A, PLCXD3, ARHGEF28, DNAH17, CACNB2, BCL2L2, CACNB3, FAM19A2, FAM19A1, FAM19A4, SERPINH1, C1ORF54, VWA5B2, UPK1B, CASZ1, PABPC3, CCSER1, HLA-DOA, POTEG, LFNG, PPP2R2C, POTEF, POTEE, CY…	2.12975e-12	2.78744e-12
CHOP	1145	MEF2C, SCN3B, GRIN3A, CDH22, TMEM144, GRIN2B, MAP3K9, RPLP0, SERPINE1, TMEFF2, SCN2B, KIF5A, BARHL1, KIF5C, SCN2A, GRIN2A, BSN, ESPL1, F7, BTBD9, LPCAT4, EGFLAM, DOC2A, NPC2, SSTR3, ARFGEF3, RYR2, MAPK9, UNC13C, SH3GL2, UNC13A, KIAA1107, NCR3LG1, KIF4A, ARHGEF28, CACNB1, CACNB2, BCL2L2, CACNB3, FAM19A1, CACNB4, RCC1, C1ORF54, RAC2, VWA5B2, CASZ1, PABPC3, PPP2R2C, SGIP1, CYP46A1, MYADML2, KIF3C, G…	2.39998e-12	3.11817e-12
IRF7	1087	PDP1, MEF2C, SCN3B, OSMR, GRIN3A, CDH22, TMEM144, DIRAS2, GRIN2B, VNN1, LRRC7, SH3GL3, TMEFF2, CYP1A1, KIF5A, KIF5C, SCN2A, GRIN2A, ESPL1, SERPING1, EXD1, BTBD9, NPC2, EGFLAM, ARFGEF3, TFPI, RYR2, CMIP, UNC13C, HLA-DRA, KIAA1107, KIF4A, PLCXD3, DNAH17, ARHGEF28, CACNB1, FAM19A2, FAM19A1, CACNB4, FAM19A4, MYBL2, RCC1, C1ORF54, UPK1B, CASZ1, CCSER1, HLA-DOA, SGIP1, ARHGEF33, KIF3A, ARHGEF39, NDC80,…	3.35052e-12	4.32177e-12
ATF	789	PDP1, OSMR, SCN3B, CRHBP, CDH22, GRIN2B, RPLP0, MAP3K9, SH3GL3, BARHL1, SCN2A, KIF5C, GRIN2A, OLFML2A, BSN, SERPING1, BTBD9, DOC2A, SSTR1, RYR2, CMIP, UNC13C, UNC13A, PLCXD3, DNAH17, CACNB1, CACNB2, CACNB3, BCL2L2, FAM19A1, MYBL2, VWA5B2, TMEM125, CASZ1, HLA-DOA, PPP2R2C, LFNG, SGIP1, ARHGEF33, MYADML2, NDC80, EMILIN2, GAS7, KIF3C, CAMK2N1, RGS1, HPCA, RGS7, ZNF536, KCNAB2, FGF9, ELF4, EZH2, SNPH…	7.87028e-12	1.00785e-11
BRN2	1190	MEF2C, OSMR, CRHBP, OR8S1, GRIN3A, TMEM144, GRIN2B, GRIN2C, SERPINE1, RAB27B, LRRC7, TMEFF2, SCN2B, KIF5A, PDPN, BARHL1, KIF5C, SCN2A, GRIN2A, BSN, HLA-DQA2, BTBD9, LPCAT4, SSTR2, EGFLAM, NPC2, ARFGEF3, SSTR1, TFPI, RYR2, CMIP, UNC13C, SH3GL2, UNC13A, KIF4A, PLCXD3, ARHGEF28, DNAH17, CACNB1, CACNB2, CACNB3, FAM19A2, FAM19A1, CACNB4, FAM19A4, SERPINH1, CASZ1, PABPC3, CCSER1, PPP2R2C, SGIP1, ARHGEF…	8.71104e-12	1.10755e-11
CMYB	1027	PDP1, MEF2C, OSMR, GRIN3A, B2M, CDH22, GRIN2B, GRIN2C, MAP3K9, RPLP0, SERPINE1, LRRC7, RAB27A, SH3GL3, TMEFF2, KIF5A, BARHL1, PTBP1, SCN2A, GRIN2A, OLFML2A, BSN, ESPL1, F7, TMEM130, BTBD9, LPCAT4, DOC2A, SSTR3, ARFGEF3, SSTR1, RYR2, CACNB3, FAM19A1, C1ORF54, VWA5B2, CASZ1, LFNG, POTEF, PPP2R2C, SGIP1, ARHGEF33, ARHGEF39, MYADML2, KIF3C, GAS7, EIF4E1B, UQCRHL, SEPT12, DUSP26, PLCXD2, ZNF536, KCNAB…	9.04148e-12	1.1414e-11
STAT1	962	MEF2C, OSMR, SCN3B, GRIN3A, CDH22, GRIN2B, GRIN2C, RPLP0, SERPINE1, VNN2, RAB27A, C17ORF96, INA, TMEFF2, SCN2B, KIF5A, SCN2A, GRIN2A, OLFML2A, BSN, SERPING1, BTBD9, LPCAT4, SSTR4, NPC2, EGFLAM, SSTR1, TFPI, RYR2, CMIP, UNC13C, SH3GL2, UNC13A, KIAA1107, KIF4A, PLCXD3, ARHGEF28, CACNB3, BCL2L2, FAM19A2, FAM19A1, CACNB4, FAM19A4, MYBL2, SERPINH1, C1ORF54, CASZ1, CCSER1, POTEF, PPP2R2C, SGIP1, ARHGEF…	9.29124e-12	1.16468e-11
EGR3	448	KIFC2, SLC9A6, HOXD12, HOXD13, PLPPR3, ACBD7, HOXD11, PGR, CDH22, HTR1A, PPP1R1B, RPLP0, MAP3K9, GNG3, C17ORF96, TMEFF2, WNT10B, KIF5A, NCF4, KIF5C, PTBP1, OLFML2A, PTPRT, BCL2L12, ADAMTS7, ADAMTS9, NPC2, RPS19, DOC2A, ARFGEF3, HNF4A, SMPX, TGIF2, UNC13A, TM6SF2, NCR3LG1, DBNDD2, ERBB4, SORCS1, BCL2L2, CTIF, P3H1, MYO15A, CASZ1, IQSEC3, ARHGEF39, MYADML2, GAS7, CAMK2N1, EIF4E1B, KCNK4, SHOX2, KCN…	2.63569e-11	3.28079e-11
NKX25	1487	MEF2C, GDA, OSMR, CRHBP, GRIN3A, CDH22, TMEM144, DIRAS2, GRIN2B, MAP3K9, RPLP0, RAB27B, LRRC7, RAB27A, INA, TMEFF2, SCN2B, BARHL1, NODAL, KIF5C, SCN2A, GRIN2A, BSN, OLFML2A, BTBD9, LPCAT4, EGFLAM, NPC2, ARFGEF3, SSTR1, MAPK9, RYR2, CMIP, UNC13C, UNC13A, SH3GL2, KIF4A, PLCXD3, ARHGEF28, DNAH17, CACNB1, CACNB2, CACNB3, FAM19A2, FAM19A1, CACNB4, FAM19A4, MYBL2, RAC2, CKLF, CASZ1, PABPC3, CCSER1, POT…	2.65981e-11	3.28783e-11
NFKAPPAB50	566	MEF2C, KIFC1, TUBB2A, STRC, MAGEC3, FRRS1L, SYP, PGR, ADTRP, KCNK9, CDCA3, SCN2B, CDHR1, BARHL1, SCN2A, KIF5C, BSN, ESPL1, PTPRT, PTPRN, BCL2L12, ADAMTS7, ADAMTS8, RPS19, CMIP, RTP5, DNAH17, CACNB1, SORCS1, CCDC167, CACNB4, CTIF, RAC2, MYO15A, PPP1R3F, CASZ1, PPP2R2C, IQSEC1, TUBB4A, ARHGEF39, NDUFA4L2, GAS7, RPS5, KCNK4, SYNGR4, KCNJ4, BTBD16, HSPA12A, SYNE1, GOLGA7B, PCNA, MAP7, FCGBP, TLL2, ZN…	4.18013e-11	5.13146e-11
PAX5	1331	GRIN3A, CDH22, DIRAS2, GRIN2B, GRIN2C, MAP3K9, SERPINE1, LRRC7, C17ORF96, INA, SH3GL3, TMEFF2, SCN2B, KIF5A, BARHL1, PTBP1, KIF5C, GRIN2A, BSN, OLFML2A, ESPL1, F7, TMEM130, BTBD9, SSTR4, EGFLAM, DOC2A, SSTR1, RYR2, MAPK9, CMIP, UNC13A, SH3GL2, HLA-DRA, NCR3LG1, ARHGEF28, DNAH17, CACNB1, BCL2L2, CACNB3, FAM19A2, CACNB4, MYBL2, SERPINH1, VWA5B2, TMEM125, UPK1B, CKLF, CASZ1, CCSER1, LFNG, SGIP1, ARH…	4.59307e-11	5.59978e-11
SPZ1	785	MEF2C, CDH22, GRIN2B, GRIN2C, SERPINE1, C17ORF96, KIF5A, BARHL1, GRIN2A, OLFML2A, BSN, SERPING1, LPCAT4, BTBD9, SSTR4, DOC2A, RYR2, UNC13C, DNAH17, CACNB1, CACNB4, FAM19A1, FAM19A4, SERPINH1, C1ORF54, VWA5B2, CASZ1, POTEG, POTEF, LFNG, POTEE, SGIP1, ARHGEF33, CYP46A1, MYADML2, GAS7, UQCRHL, DUSP26, HPCA, RGS7, PLCXD2, ZNF536, FGF9, NUAK1, ELF4, YBX3, PCP4L1, MAP1LC3C, SNPH, CEACAM6, CEACAM5, ARL5…	5.02422e-11	6.08376e-11
GRE	1123	MEF2C, CRHBP, GRIN3A, CDH22, GRIN2B, GRIN2C, MAP3K9, LRRC7, C17ORF96, SH3GL3, TMEFF2, CYP1A1, SCN2A, GRIN2A, BSN, ESPL1, F7, EXD1, BTBD9, LPCAT4, SSTR4, EGFLAM, ARFGEF3, RYR2, CMIP, UNC13C, UNC13A, KIAA1107, PLCXD3, ARHGEF28, CACNB1, FAM19A1, CACNB4, FAM19A4, MYBL2, VWA5B2, CASZ1, PABPC3, CCSER1, POTEG, LFNG, POTEF, PPP2R2C, POTEE, SGIP1, KIF3A, ARHGEF39, MYADML2, EMILIN2, KIF3C, GAS7, SEPT12, DU…	7.21945e-11	8.68284e-11
CART1	1125	PDP1, MEF2C, GDA, SCN3B, OSMR, GRIN3A, CDH22, GRIN2B, GRIN2C, RPLP0, RAB27B, LRRC7, RAB27A, INA, SH3GL3, TMEFF2, SCN2B, KIF5A, KIF5C, SCN2A, GRIN2A, OLFML2A, TMEM130, BTBD9, SSTR2, EGFLAM, ARFGEF3, SSTR1, RYR2, MAPK9, CMIP, UNC13C, SH3GL2, UNC13A, KIAA1107, KIF4A, PLCXD3, ARHGEF28, CACNB1, CACNB2, FAM19A2, FAM19A1, CACNB4, FAM19A4, C1ORF54, CKLF, CASZ1, CCSER1, POTEG, POTEF, SGIP1, ARHGEF33, CYP4…	7.9708e-11	9.52216e-11
SRY	996	MEF2C, GDA, GRIN3A, GRIN2B, SERPINE1, RAB27B, LRRC7, RAB27A, SH3GL3, TMEFF2, PDPN, KIF5A, BARHL1, SCN2A, KIF5C, GRIN2A, ESPL1, SERPING1, BTBD9, LPCAT4, SSTR4, EGFLAM, ARFGEF3, SSTR1, RYR2, MAPK9, UNC13C, SH3GL2, KIF4A, PLCXD3, ARHGEF28, CACNB1, CACNB2, CACNB3, BCL2L2, FAM19A2, FAM19A1, CACNB4, FAM19A4, VWA5B2, CASZ1, CCSER1, SGIP1, ARHGEF33, KIF3A, GAS7, KIF3C, CAMK2N1, EIF4E1B, BTBD16, RGS4, RGS…	1.05329e-10	1.24991e-10
YY1	1632	MEF2C, GDA, SCN3B, OSMR, DIRAS2, MAP3K9, RPLP0, RAB27B, VNN2, LRRC7, RAB27A, TMEFF2, SCN2B, PTBP1, SCN2A, BSN, BTBD9, DOC2A, EGFLAM, ARHGEF28, DNAH17, CACNB1, CACNB2, FAM19A2, CACNB3, FAM19A1, CACNB4, FAM19A4, CCSER1, LFNG, CYP46A1, ARHGEF39, NDC80, GAS7, CAMK2N1, EIF4E1B, RGS1, DUSP26, PARP9, RGS4, RGS7, GRIP1, EZH2, PCP4L1, YBX3, MMP25, IL1RAP, IGFLR1, SLC22A6, CACNG8, SLC22A8, ARHGEF19, CACNG3…	1.29486e-10	1.52639e-10
SOX5	1128	MEF2C, SCN3B, OSMR, GRIN3A, GRIN2B, SERPINE1, RAB27B, LRRC7, RAB27A, INA, SH3GL3, TMEFF2, KIF5A, PDPN, BARHL1, PTBP1, KIF5C, SCN2A, GRIN2A, OLFML2A, ESPL1, TMEM130, BTBD9, SSTR4, EGFLAM, ARFGEF3, SSTR1, TFPI, RYR2, MAPK9, CMIP, UNC13C, SH3GL2, UNC13A, KIAA1107, KIF4A, PLCXD3, ARHGEF28, CACNB1, CACNB2, BCL2L2, CACNB3, FAM19A2, FAM19A1, CACNB4, FAM19A4, SERPINH1, VWA5B2, CASZ1, CCSER1, LFNG, SGIP1,…	5.20523e-10	6.0956e-10
CDC5	1064	PDP1, MEF2C, GDA, OSMR, GRIN3A, CDH22, GRIN2B, VNN1, RAB27B, LRRC7, VNN2, TMEFF2, SCN2B, KIF5C, SCN2A, GRIN2A, OLFML2A, BTBD9, LPCAT4, SSTR4, SSTR2, NPC2, EGFLAM, ARFGEF3, RYR2, CMIP, UNC13C, SH3GL2, KIAA1107, KIF4A, PLCXD3, DNAH17, ARHGEF28, CACNB2, BCL2L2, CACNB3, FAM19A2, FAM19A1, CACNB4, FAM19A4, VWA5B2, CASZ1, PABPC3, CCSER1, PPP2R2C, SGIP1, ARHGEF33, KIF3A, ARHGEF39, NDC80, SERPINI1, GAS7, …	6.30566e-10	7.336e-10
FOXJ2	1526	MEF2C, PDP1, GDA, CRHBP, GRIN3A, CDH22, GRIN2B, RAB27B, LRRC7, VNN2, SH3GL3, TMEFF2, KIF5A, BARHL1, PTBP1, KIF5C, SCN2A, GRIN2A, BSN, EXD1, TMEM130, BTBD9, LPCAT4, SSTR4, EGFLAM, DOC2A, NPC2, ARFGEF3, SSTR1, TFPI, MAPK9, RYR2, CMIP, UNC13C, UNC13A, SH3GL2, HLA-DRA, KIAA1107, KIF4A, PLCXD3, ARHGEF28, DNAH17, CACNB1, CACNB2, BCL2L2, CACNB3, FAM19A2, FAM19A1, CACNB4, FAM19A4, RCC1, UPK1B, CASZ1, CCS…	6.31086e-10	7.29437e-10
MEIS1AHOXA9	835	MEF2C, CRHBP, GRIN3A, CDH22, GRIN2B, GRIN2C, RPLP0, SERPINE1, RAB27B, LRRC7, SH3GL3, TMEFF2, CYP1A1, KIF5A, BARHL1, SCN2A, KIF5C, GRIN2A, BSN, ESPL1, BTBD9, SSTR4, NPC2, EGFLAM, ARFGEF3, RYR2, MAPK9, UNC13C, SH3GL2, UNC13A, DNAH17, FAM19A2, CACNB4, FAM19A1, FAM19A4, CASZ1, CCSER1, PPP2R2C, SGIP1, MYADML2, NDC80, GAS7, RGS7, MAB21L3, PLCXD2, OPRM1, ZNF536, KCNAB2, ELF4, NUAK1, GRIP1, KCNAB1, DPP10…	1.18613e-09	1.36213e-09
MRF2	1191	PDP1, MEF2C, GDA, SCN3B, OSMR, GRIN3A, CDH22, GRIN2B, VNN1, LRRC7, VNN2, RAB27A, C17ORF96, INA, TMEFF2, SCN2B, KIF5A, NODAL, PTBP1, KIF5C, SCN2A, GRIN2A, BSN, F7, HLA-DQA2, BTBD9, HLA-DQA1, NPC2, ARFGEF3, SSTR1, RYR2, MAPK9, UNC13C, SH3GL2, UNC13A, KIAA1107, NCR3LG1, KIF4A, ARHGEF28, DNAH17, CACNB1, CACNB2, CACNB3, FAM19A2, FAM19A1, CACNB4, FAM19A4, RCC1, VWA5B2, CASZ1, CCSER1, LFNG, PPP2R2C, SGI…	2.26892e-09	2.5889e-09
CREL	421	KIFC1, PLEKHM3, SLC9A2, TESPA1, PGR, GRIN2B, GRIN2C, TCP10L2, GNG3, WNT10B, CDHR1, PTPRT, PCLO, BTBD9, TMEM132D, LPCAT4, ADAMTS9, RPS19, ADAMTS8, EGFLAM, RYR2, RPS10, UNC13C, IL1R2, DBNDD2, ERBB4, ARHGEF28, PCDH20, CCDC167, FAM19A2, BCL2L2, CACNB3, CACNB4, CTIF, SORCS3, KCNJ1, PROCR, PPP1R3F, CASZ1, IQSEC3, LFNG, CCDC80, SYNGR4, BTBD16, MAB21L3, TLL2, PLCXD2, GNAZ, ZNF536, ELF4, PDE11A, KCNK12, S…	2.63935e-09	2.99238e-09
MAZR	530	KIFC1, SLC9A6, MASP1, PTGS1, HOXD12, HOXD13, HOXD11, SYP, CDH22, PPP1R1B, PPP1R1A, RPLP0, CDCA3, C17ORF96, WNT10B, KIF5A, GRIN2A, OLFML2A, BCL2L12, ADAMTS7, RPS18, DOC2A, ST14, CD164L2, TGIF1, TM6SF2, KIF4A, MGAT5B, DBNDD2, ACP7, CACNB1, FAM19A1, SERPINH1, CTIF, SORCS2, ADRB3, VWA5B2, MYO15A, CASZ1, PLTP, IQSEC2, CYP46A1, NDUFA4L2, EME1, MYADML2, GAS7, KCNK4, TNNI2, KCNJ4, HSPA12A, SYNE1, PARP9, …	8.0494e-09	9.06831e-09
PBX1	1332	MEF2C, GDA, SCN3B, OSMR, GRIN3A, CDH22, GRIN2B, GRIN2C, MAP3K9, RPLP0, VNN1, RAB27B, LRRC7, C17ORF96, INA, SH3GL3, TMEFF2, KIF5A, BARHL1, KIF5C, SCN2A, GRIN2A, BSN, OLFML2A, SERPING1, HLA-DQA2, BTBD9, HLA-DQA1, SSTR2, EGFLAM, DOC2A, ARFGEF3, SSTR1, MAPK9, RYR2, CMIP, UNC13C, UNC13A, SH3GL2, HLA-DRA, KIAA1107, KIF4A, PLCXD3, ARHGEF28, DNAH17, CACNB2, BCL2L2, CACNB3, FAM19A2, FAM19A1, CACNB4, FAM19…	8.93218e-09	9.99954e-09
IRF1	614	PDP1, MEF2C, PLEKHM3, TUBB2A, SLC9A2, FSTL4, GRIN3A, PLPPR3, HOXD10, HOXD11, B2M, CDCA8, HTR1B, GRIN2B, RPLP0, FSTL5, SERPINE1, RAB27B, CCNA2, LRRC7, TMEFF2, KIF5A, BARHL1, TTC7B, PTBP1, SCN2A, KIF5C, GRIN2A, PTPRR, PTPRT, EXD1, HNF4G, PCLO, BTBD9, TMEM132D, CTNNA3, SSTR4, ADAMTS9, SSTR3, ARFGEF3, RYR2, ST18, UNC13C, PLCXD3, KIF4A, RTP4, ERBB4, RUNDC3B, CACNB2, FAM19A2, CACNB3, CACNB4, FAM19A1, S…	1.0326e-08	1.14876e-08
AP2	614	KIFC2, KIFC1, SLC9A6, PGF, STRC, SLC9A2, HOXD12, PLPPR4, FSTL4, HOXD13, HOXD10, HOXD11, PGR, CDH22, KCNK9, HTR1A, GRIN2C, PPP1R1B, RPLP0, MAP3K9, C17ORF96, INA, NWD2, TMEFF2, WNT10B, BARHL1, CDHR2, BSN, PTPRN, PCLO, RPS18, SSTR3, ARFGEF3, BHLHA9, CD164L2, TGIF1, FAM163B, MGAT5B, CACNB1, SORCS1, CACNB2, FAM19A2, CACNB3, BCL2L2, SORCS2, CTIF, SORCS3, P3H2, P3H1, CCDC102A, CASZ1, IQSEC3, LFNG, PPP2R…	2.56671e-08	2.83773e-08
TATA	1256	PDP1, MEF2C, OSMR, CRHBP, GRIN3A, B2M, CDH22, TMEM144, GRIN2B, GRIN2C, MAP3K9, RPLP0, SERPINE1, RAB27B, LRRC7, VNN2, INA, SH3GL3, TMEFF2, CYP1A1, PTBP1, KIF5C, GRIN2A, ESPL1, F7, EXD1, TMEM130, BTBD9, LPCAT4, SSTR4, EGFLAM, RYR2, MAPK9, CMIP, UNC13C, SH3GL2, KIF4A, PLCXD3, ARHGEF28, CACNB1, CACNB2, FAM19A2, FAM19A1, CACNB4, FAM19A4, SERPINH1, C1ORF54, UPK1B, CASZ1, PABPC3, CCSER1, PPP2R2C, SGIP1,…	3.29047e-08	3.61545e-08
CDP	1380	PDP1, MEF2C, GDA, OSMR, CRHBP, GRIN3A, CDH22, TMEM144, GRIN2B, VNN1, RAB27B, LRRC7, C17ORF96, SH3GL3, TMEFF2, KIF5A, BARHL1, KIF5C, SCN2A, GRIN2A, BSN, BTBD9, SSTR2, EGFLAM, DOC2A, NPC2, ARFGEF3, SSTR1, RYR2, UNC13C, SH3GL2, KIAA1107, KIF4A, PLCXD3, ARHGEF28, DNAH17, CACNB2, BCL2L2, CACNB3, FAM19A2, FAM19A1, CACNB4, FAM19A4, C1ORF54, UPK1B, CASZ1, PABPC3, CCSER1, HLA-DOA, PPP2R2C, SGIP1, ARHGEF33…	5.47698e-08	5.981e-08
CREBP1CJUN	340	PDP1, SYT1, PNMA3, MASP1, ADCY5, PDLIM3, FSTL4, SIDT1, SYT7, CDH22, BDNF, MYD88, GRIN2B, RPLP0, WDR76, VNN1, RAPGEF4, RAPGEF2, C17ORF96, NWD2, EMX1, ATRNL1, CDHR2, SCN2A, GRIN2A, HTR4, OLFML2A, PTPRT, NAV3, PTPRN, BTBD9, CTNNA3, SSTR4, EGFLAM, FER1L6, RYR2, TUBA4A, CD164L2, MAPK9, HAS2, CMIP, TGFB1I1, UNC13C, IBSP, TDRD5, HOXA13, ARHGEF28, HOXA11, GPR149, SORCS1, CACNB2, CD74, TP53TG5, ADAP1, SOR…	2.26949e-07	2.46322e-07
POU3F2	1358	PDP1, MEF2C, GDA, SCN3B, OSMR, CRHBP, GRIN3A, TMEM144, GRIN2B, GRIN2C, RPLP0, SERPINE1, RAB27B, LRRC7, VNN2, SH3GL3, TMEFF2, KIF5A, PDPN, BARHL1, KIF5C, SCN2A, GRIN2A, BSN, OLFML2A, ESPL1, F7, EXD1, BTBD9, EGFLAM, ARFGEF3, SSTR1, TFPI, MAPK9, RYR2, CMIP, UNC13C, UNC13A, SH3GL2, KIAA1107, KIF4A, PLCXD3, ARHGEF28, CACNB2, FAM19A2, FAM19A1, CACNB4, FAM19A4, VWA5B2, TMEM125, CKLF, CASZ1, CCSER1, POTE…	2.56625e-07	2.76844e-07
NMYC	736	C15ORF48, KIFC2, MEF2C, KIFC1, PTGS1, SLC9A2, HOXD12, FSTL4, HOXD13, L1CAM, GRIN3A, PLPPR3, HOXD10, HOXD11, CDH22, GRIN2C, PPP1R1B, RPLP0, SERPINE1, GNG3, CDCA3, C17ORF96, NWD2, TMEFF2, WNT10B, TTC7B, PTBP1, KIF5C, GRIN2A, OLFML2A, BSN, PTPRT, BCL2L12, LPCAT4, NME4, ADAMTS6, ADAMTS9, RPS18, PITPNM3, EGFLAM, RPS19, ARFGEF3, BHLHA9, TGIF1, TGIF2, CMIP, UNC13A, TM6SF2, ERBB4, GNAI1, CACNB1, RUNDC3B,…	6.37583e-07	6.83673e-07
EVI1	1858	MEF2C, GDA, SCN3B, OSMR, DIRAS2, MAP3K9, RPLP0, RAB27B, LRRC7, VNN2, RAB27A, TMEFF2, SCN2B, BARHL1, PTBP1, SCN2A, BSN, BTBD9, EGFLAM, TFPI, ARHGEF28, DNAH17, CACNB1, CACNB2, FAM19A2, CACNB3, CACNB4, FAM19A1, FAM19A4, CCSER1, LFNG, ARHGEF33, CYP46A1, GAS7, EIF4E1B, RGS1, DUSP26, PARP9, RGS4, HPCA, RGS7, GRIP1, NUAK1, EZH2, PCP4L1, YBX3, LRRC17, SCIMP, GTSE1, YBX1, IL1RAP, IGFLR1, SLC22A6, SLC22A2,…	1.14152e-06	1.21671e-06
NKX3A	1056	MEF2C, GDA, OSMR, CRHBP, OR8S1, GRIN3A, GRIN2B, MAP3K9, LRRC7, VNN2, RAB27A, SH3GL3, TMEFF2, KIF5C, SCN2A, GRIN2A, ESPL1, EXD1, BTBD9, EGFLAM, SSTR1, RYR2, UNC13C, SH3GL2, KIF4A, PLCXD3, ARHGEF28, CACNB2, BCL2L2, FAM19A2, FAM19A1, CACNB4, FAM19A4, CASZ1, CCSER1, POTEF, SGIP1, ARHGEF33, NDC80, SERPINI1, KIF3C, RGS1, RGS4, AKNAD1, HPCA, RGS7, PLCXD2, OPRM1, ZNF536, ELF4, KCNAB1, GRIP1, FGF9, DPP10,…	1.92107e-06	2.03542e-06
EGR1	202	KIFC2, C11ORF42, OSMR, SCN3B, SNCA, EFNA3, SYP, ATP2B2, BDNF, CDCA8, ATP2B3, PRRT2, PRRT1, PELI3, TMEFF2, WNT10B, HTR4, BSN, RND2, ADAMTS6, ADAMTS8, RAB15, TGIF2, EFNA4, UNC13A, HOXA13, TICRR, HOXA11, SORCS1, RIMS2, PEX5L, CTIF, IFI35, ADAP1, RIMS3, CASZ1, HOXA10, IL1RAPL1, SGIP1, IQSEC2, MAML2, GPR150, CELSR1, CD63, ABCG4, KIF3C, GAS7, LAMA4, JPH3, NUAK1, FGF9, WASF1, SYNJ1, KCNJ12, KCNIP2, CD15…	3.84041e-05	4.04493e-05
OCT1	1993	MEF2C, GDA, SCN3B, OSMR, B2M, MAP3K9, RPLP0, VNN1, RAB27B, LRRC7, VNN2, RAB27A, TMEFF2, CYP1A1, SCN2B, BARHL1, PTBP1, SCN2A, BSN, BTBD9, EGFLAM, DOC2A, TFPI, NCR3LG1, ARHGEF28, DNAH17, CACNB1, CACNB2, FAM19A2, CACNB3, CACNB4, FAM19A1, FAM19A4, UPK1B, CKLF, CCSER1, ARHGEF33, ARHGEF39, CYP46A1, NDC80, GAS7, CAMK2N1, EIF4E1B, RGS1, PARP9, RGS4, HPCA, RGS7, GRIP1, NUAK1, EZH2, PCP4L1, YBX3, MMP25, YB…	3.92597e-05	4.11072e-05
AP2GAMMA	266	KIFC1, C11ORF42, ADCY5, PRR11, SYT9, CDH22, ATP2B2, MYD88, PRRT2, PPP1R1B, RPLP0, SERPINE1, PELI3, ADGRB3, EMX1, NCF2, TTC7B, OLFML2A, PTPRT, ABCC12, BCL2L12, PCLO, CRHR1, EGFLAM, ARFGEF3, FER1L6, RYR2, TGIF1, MFNG, MGAT5B, HOXA13, ENPP2, HOXA11, ELN, BCL2L2, AFAP1L1, CD74, ADAP1, SOWAHA, KIAA1549L, SORCS3, SLC11A1, CD68, LAMB2, VWA5B2, HOXA10, CASZ1, LHX6, LHX9, GAD1, PLTP, BMP1, CYP46A1, NDUFA4…	6.36524e-05	6.62579e-05
ZIC1	337	CALHM1, KIFC2, STAR, OSMR, SYT2, STRC, EFNA3, HOXD12, FSTL4, HOXD13, OR8S1, AURKB, EDIL3, C1QC, HOXD10, TMEM151A, HOXD11, ATP2B2, CDCA8, GRIN2B, CHRNA4, RAPGEF4, NUP37, PITX1, SH3GL3, NWD2, PTPRR, BSN, OLFML2A, ESPL1, PTPRT, ABCC12, WNK2, CTNNA3, TMEM150B, ADAMTS7, C1QA, ADAMTS6, C1QB, CRHR2, RPS18, ADAMTS8, ARFGEF3, ST14, FER1L6, RYR2, MAPK9, RPS10, EFNA4, UNC13C, FAM163B, CALY, ERBB4, CHEK1, TA…	0.000117884	0.000121996
ELK1	1092	MEF2C, GRIN3A, CDH22, GRIN2B, GRIN2C, RPLP0, SERPINE1, LRRC7, RAB27A, INA, TMEFF2, KIF5A, PTBP1, SCN2A, OLFML2A, BSN, ESPL1, TMEM130, DOC2A, NPC2, ARFGEF3, SSTR1, RYR2, MAPK9, CMIP, UNC13C, SH3GL2, NCR3LG1, KIF4A, PLCXD3, DNAH17, ARHGEF28, CACNB1, CACNB2, BCL2L2, CACNB3, FAM19A2, FAM19A1, CACNB4, MYBL2, SERPINH1, C1ORF54, VWA5B2, TMEM125, CASZ1, PABPC3, CCSER1, LFNG, PPP2R2C, SGIP1, KIF3A, ARHGEF…	0.00770149	0.00792319
SP1	538	KIFC2, MEF2C, SLC9A6, PLPPR3, SYP, CDH22, CDCA7, GRIN2C, PPP1R1B, FSTL5, CDCA2, INA, WNT10B, PTBP1, CDHR2, GRIN2A, BSN, OLFML2A, EXD1, MAGED4, ADAMTS7, PITPNM3, CD164L2, RPS10, TGIF2, UNC13A, RTP5, ERBB4, ACP7, CACNB1, RUNDC3B, CACNB2, RUNDC3A, CACNB3, BCL2L2, CTIF, ADCYAP1, C1ORF54, CASZ1, IQSEC3, LFNG, IQSEC1, ARHGEF39, NDUFA4L2, ROGDI, SERPINI1, CAMK2N1, EIF4E1B, KCNK4, SEPT12, SHOX2, KCNJ4, S…	0.020171	0.0206299
